# Supplementary material for: Conditional transcriptional relationships may serve as cancer prognostic markers
Source: BMC Med Genomics. 2021 Dec 2;14(Suppl 2):101. doi: 10.1186/s12920-021-00958-3 (PMC8638091; doi:10.1186/s12920-021-00958-3)
Supplement: Supplementary file 2 — Additional file 2: Table S1. Prognosis DCLs in five cancer types. [file 12920_2021_958_MOESM2_ESM.xlsx]

## Sheet: HNSC
DCL	CILP p	Survival Analysis p
LEO1,HDAC2	6.08604e-08	0.0192405
PRKX,SERBP1	2.71208e-07	0.0920913
UQCR10,CHCHD2	4.8605e-07	0.110712
NFRKB,RPUSD4	5.44592e-09	0.230903
HSPA4,TARS	4.01592e-07	0.2915
SH3GL1,UBXN6	2.3526e-07	0.308709
SERBP1,GMPS	1.06009e-07	0.358347
PGD,TXNRD1	3.47598e-08	0.467891
GAS6,CUEDC2	4.22608e-07	0.53505
KIAA1468,TAF2	2.44385e-07	0.671921
TCEAL1,OCRL	2.2627e-07	0.768622
FTL,PGD	5.15169e-07	0.967105
ETF1,TARS	1.13082e-07	0.997602

## Sheet: KIPAN
DCL	CILP p	Survival Analysis p
PHKA2,SPG7	1.0868e-08	4.38867e-13
ADD3,DARS	6.90004e-08	3.81714e-10
NARF,GRB2	4.52357e-10	3.21319e-09
C11orf54,ACAD10	2.4235e-09	3.90409e-09
ACLY,KHDRBS1	2.67761e-07	7.53627e-09
AQR,XPO5	1.70155e-11	1.57983e-08
HMGB3,MSH6	4.42729e-09	1.92667e-08
MRVI1,RNF141	2.35704e-07	2.03133e-08
PLIN2,PMPCA	2.15769e-09	2.13146e-08
POLR3B,POLR1B	1.8414e-07	2.46133e-08
NARF,WIPI1	1.66747e-11	2.46347e-08
TTR,G6PC	7.16369e-11	2.60973e-08
TRNT1,CEBPZ	5.09968e-08	2.87932e-08
SLC25A3,TOMM20	4.02533e-09	3.44658e-08
PLXND1,NCKAP5L	2.28609e-07	3.47754e-08
ACAD10,FBF1	8.61786e-09	3.72071e-08
CAP1,SLC9A1	4.47891e-09	6.33268e-08
BTBD1,TSN	6.16907e-10	6.5281e-08
PLIN2,LDHA	6.09327e-18	6.7795e-08
RLF,BNIP3	1.16657e-07	7.53114e-08
C2orf48,CENPN	2.45687e-07	8.07115e-08
ARPC1B,SLC12A9	2.21439e-09	8.17326e-08
ALS2CL,SHANK3	1.28708e-09	1.01893e-07
MXI1,GDE1	1.77946e-07	1.31124e-07
PISD,FOXRED1	2.03088e-09	1.37691e-07
AKAP8,RHOT2	1.74245e-11	1.37856e-07
TOP2A,SHCBP1	9.7767e-10	1.38349e-07
ANLN,SHCBP1	3.77792e-08	1.40885e-07
MAGOHB,SF3A3	4.28208e-08	1.59673e-07
KDELR3,LMAN1	4.60803e-08	1.79557e-07
ARL8B,SHOC2	4.31376e-08	2.15275e-07
SPAG5,HMGB2	1.25983e-08	2.46245e-07
GOT2,DDX1	2.95445e-07	2.61134e-07
AQR,EFTUD2	1.60544e-10	2.78771e-07
PSAT1,SLC16A1	4.35072e-13	3.30318e-07
TTK,SHCBP1	2.3324e-07	3.34581e-07
XPO5,GMPS	4.45723e-07	3.46378e-07
GDE1,VPS26A	1.20064e-10	3.58907e-07
DUSP7,MNT	2.43579e-07	3.79989e-07
ASPM,SHCBP1	3.75139e-10	3.87462e-07
SPAG5,TTK	1.98665e-08	4.22795e-07
GDE1,CREG1	7.45634e-12	4.39806e-07
C10orf71,MYL3	7.31574e-09	4.62259e-07
SPAG5,BUB1B	3.39025e-14	5.09087e-07
QARS,RPL22	1.167e-07	5.29341e-07
CENPF,SHCBP1	3.70609e-08	5.32889e-07
LBR,SLBP	3.07223e-08	5.45424e-07
SCARB1,ACAD10	3.01673e-08	5.53169e-07
GDE1,MLF2	2.74919e-07	5.58903e-07
EPHA1,ALS2CL	1.0911e-08	5.95684e-07
DVL3,KDM2A	2.33161e-07	6.02784e-07
EPRS,OGFOD1	1.69062e-09	6.29192e-07
SPAG5,GINS2	3.10792e-10	6.42038e-07
TNS1,ADIPOR1	9.59913e-10	6.53506e-07
ZNF189,INSIG2	1.34219e-09	6.7901e-07
GTSE1,SHCBP1	2.91015e-09	7.2187e-07
GLB1,PPT1	4.66422e-09	7.22652e-07
GDE1,TMEM8A	1.10196e-07	8.10712e-07
LDHA,ZNF395	7.96675e-09	8.33918e-07
AKR1C2,GCLC	1.07013e-08	8.55616e-07
TPX2,SHCBP1	4.64331e-08	8.82996e-07
GNPNAT1,NOL11	2.85975e-10	9.54391e-07
KIF20A,SHCBP1	1.73467e-09	9.94005e-07
TRNT1,G3BP1	5.95114e-09	1.04507e-06
ADD3,MXI1	2.82831e-09	1.04939e-06
GALC,TMEM9B	2.01442e-07	1.11796e-06
ACAA2,PMPCB	1.27518e-07	1.13195e-06
CREG1,GLB1	1.47783e-08	1.261e-06
PFKP,KLC2	8.71136e-15	1.294e-06
PLS3,ANXA2	2.5165e-09	1.41417e-06
EHBP1,RSU1	3.08506e-08	1.42707e-06
TRABD,AKAP8	2.4341e-07	1.52053e-06
CTSA,TMEM8A	5.8534e-08	1.59959e-06
ACADM,SUCLG1	4.63097e-07	1.61875e-06
AKR1C1,GCLC	2.37311e-12	1.61938e-06
MXI1,HECA	1.4516e-08	1.64041e-06
MPI,NDUFV1	1.14552e-07	1.84934e-06
SPAG5,ASF1B	7.10586e-11	1.87056e-06
SKI,RAB11B	6.72732e-08	1.87957e-06
PLXND1,FAM160B2	4.2955e-11	1.89093e-06
COL4A1,LAMB1	4.44922e-07	1.94165e-06
SLC25A3,CSDE1	1.38392e-07	1.94656e-06
CS,CSDE1	3.84445e-09	1.96112e-06
ATP6AP2,LMBRD1	1.80501e-08	1.9835e-06
PPT1,GDE1	1.09897e-10	2.02517e-06
PDIA6,MANF	4.16064e-10	2.08009e-06
MSN,STARD8	7.87329e-09	2.08377e-06
SKI,ATP6V0C	8.64701e-09	2.11435e-06
LLGL2,SOX13	3.06335e-09	2.15239e-06
TPRG1L,ACOX1	4.16334e-12	2.22412e-06
CD109,SASH1	1.01105e-11	2.58571e-06
SHCBP1,MELK	8.00005e-11	2.63445e-06
PPFIA4,MXI1	1.64542e-14	2.68533e-06
LETM1,ACLY	7.9604e-10	2.71773e-06
DUSP4,TNFRSF12A	3.46485e-08	2.77925e-06
BUB1B,ESPL1	5.92179e-11	2.86353e-06
PLXND1,RHBDF1	3.40841e-09	2.93662e-06
OSBP,SRP68	9.30026e-11	3.08178e-06
PSAT1,STC2	2.18623e-17	3.10102e-06
PEX2,DHX40	2.31159e-11	3.11927e-06
ATP6AP2,LIPA	1.62207e-07	3.2018e-06
SOX13,SGSH	3.18477e-08	3.21376e-06
P4HA1,VEGFA	4.19744e-10	3.23092e-06
CLEC14A,TINAGL1	1.17774e-09	3.3365e-06
RPA1,CHAF1B	8.68013e-15	3.51821e-06
CEBPZ,THUMPD3	6.26131e-09	3.52556e-06
POLR3B,GEMIN5	3.99146e-07	3.52694e-06
NSF,COPB1	2.37338e-07	3.57542e-06
COPS7B,NFS1	6.47115e-10	3.65706e-06
PLEKHG2,ABCC10	2.38991e-08	3.82745e-06
GBA3,TTR	6.32726e-13	3.82968e-06
SHCBP1,NUF2	6.1256e-08	3.96105e-06
NAA40,ACAD10	9.95058e-13	3.97284e-06
PFKFB3,RNF19B	7.58104e-08	4.00243e-06
LDHA,MPI	6.42145e-19	4.01742e-06
NCAPG,SHCBP1	3.96082e-08	4.07355e-06
COX4I1,RPL22	1.46599e-08	4.13448e-06
SLC2A1,DVL3	2.62509e-08	4.24202e-06
SPAG5,CCNB1	1.41793e-10	4.27693e-06
TK1,FAM83D	1.48808e-12	4.42617e-06
MPI,APRT	3.50147e-07	4.74146e-06
NOTCH1,LRCH4	4.65018e-09	4.8612e-06
KIF18B,SHCBP1	2.52556e-07	5.03395e-06
HSPG2,RHBDF1	1.21537e-08	5.17897e-06
NSF,RAB2A	8.20307e-09	5.24351e-06
CSPG4,NCKAP5L	1.08683e-09	5.60586e-06
AMD1,CYCS	7.98507e-11	5.86626e-06
PLIN2,ITGA5	1.02987e-07	6.02211e-06
SPRED1,SASH1	1.8161e-07	6.10531e-06
SPINK1,USH1C	1.91982e-10	6.1082e-06
MAML1,ATXN2L	5.77727e-09	6.23707e-06
TWF1,SP3	8.86628e-08	6.29369e-06
PELI1,AFTPH	1.80203e-09	6.52301e-06
GLUD1,ALDH6A1	1.37346e-09	6.5583e-06
P4HA1,STC1	4.97509e-09	6.58977e-06
SGCB,TXNDC15	9.50084e-12	6.77945e-06
APOO,DDX1	6.79553e-08	6.86382e-06
TMEM189,SLC2A1	2.37469e-07	6.99283e-06
ABCF2,POLR3C	2.71034e-07	7.02881e-06
GJB1,TTR	2.65094e-13	7.27155e-06
MFGE8,RHBDF1	2.65996e-07	7.31073e-06
DBN1,ITGA5	1.09743e-09	7.43298e-06
PIGK,TMX4	1.36409e-07	8.20202e-06
TRAIP,FAM83D	2.70177e-07	8.21676e-06
SLC16A1,AMD1	6.52131e-12	8.49367e-06
HMCN1,ITGA8	1.77666e-07	8.616e-06
ITGA5,STARD8	9.63426e-09	8.79041e-06
CDCA8,SHCBP1	2.38904e-07	8.83234e-06
FOXM1,SHCBP1	2.85194e-07	8.85209e-06
GSTZ1,MPI	6.97957e-10	8.95901e-06
OAZ2,TRAPPC1	2.84495e-07	9.52476e-06
PLIN2,POLR3C	5.2323e-10	9.53251e-06
PSAT1,FXN	1.17209e-07	9.56735e-06
ZNF25,SLC25A12	3.63183e-07	9.63123e-06
RASIP1,TINAGL1	1.44298e-07	9.74571e-06
TPM2,NSUN5P1	2.5392e-08	9.92582e-06
ADIPOR1,GDE1	3.77406e-08	1.02343e-05
SAT2,MRPL33	1.71964e-07	1.03407e-05
PAK4,SOX13	5.42836e-12	1.04726e-05
HMMR,SHCBP1	2.00556e-09	1.04755e-05
NSF,RNF141	7.01966e-10	1.07174e-05
TUBG1,NUP85	3.54721e-07	1.07312e-05
DDIT3,PPP1R15B	5.76771e-08	1.07341e-05
DDX1,THUMPD3	4.09156e-09	1.08295e-05
PLIN2,LONP1	1.74759e-12	1.1193e-05
STC2,LONP1	4.42396e-08	1.12709e-05
TINAGL1,MMRN2	7.74831e-08	1.13217e-05
BIRC5,SHCBP1	1.33486e-07	1.14816e-05
MCAM,BCAR1	3.35481e-08	1.14861e-05
ATP6AP2,LAPTM4A	6.15721e-09	1.19074e-05
SLC25A3,ST13	7.91652e-08	1.19525e-05
NDUFAF3,MPI	1.14321e-07	1.22594e-05
DDAH1,ACTN1	4.45665e-10	1.24019e-05
IPO9,CHAF1B	1.06772e-11	1.25812e-05
ISCU,ST13	5.42762e-08	1.26846e-05
MSH2,CHAF1B	1.19469e-07	1.27421e-05
PDK1,SEC23A	6.0275e-08	1.28317e-05
TIMM44,GARS	1.32419e-09	1.32208e-05
SHCBP1,CCNB2	3.51016e-08	1.32389e-05
ARID5B,SASH1	2.73155e-08	1.33022e-05
EHHADH,DECR1	1.00221e-07	1.35187e-05
CDK5RAP1,IK	3.81957e-09	1.37278e-05
NBEAL2,VASP	2.50005e-08	1.38248e-05
MPI,ACAD10	9.52955e-12	1.43802e-05
BNIP3,OXSM	1.34727e-08	1.45816e-05
ALDOC,PLEKHB1	1.04902e-08	1.46387e-05
CLUAP1,ELP3	2.34523e-07	1.47476e-05
PECAM1,STARD8	2.89439e-10	1.48582e-05
PFKP,BNIP3	8.44159e-12	1.48627e-05
VGLL1,TFAP2C	3.22094e-07	1.49188e-05
SPAG5,KIF23	1.31313e-09	1.54423e-05
EHHADH,GSTZ1	4.74837e-12	1.55262e-05
FANCC,CDC7	1.37422e-07	1.56537e-05
TAF7,ST13	1.31623e-08	1.5667e-05
SPAG5,TPX2	8.2646e-11	1.60681e-05
MKI67,TK1	1.1393e-07	1.63149e-05
SLC2A1,BNIP3	5.6366e-13	1.65431e-05
ZWINT,DEPDC1B	1.96021e-12	1.68678e-05
GMPS,EFTUD2	8.11193e-08	1.7508e-05
SPRY4,BCAR1	2.48984e-07	1.77994e-05
HOXA3,HOXD10	1.69742e-11	1.79416e-05
RNASEH2A,SPAG5	1.59407e-11	1.7966e-05
GLYAT,TTR	1.14927e-12	1.80888e-05
IQUB,ARL6	6.33247e-08	1.81472e-05
CENPF,DEPDC1B	2.02004e-07	1.82282e-05
STX12,HEATR5B	3.8646e-08	1.89416e-05
RBM43,LY6E	1.37248e-07	1.93336e-05
DDX1,PDHA1	4.43204e-08	1.9365e-05
ANGPTL4,BCAR1	1.15317e-08	1.97403e-05
CS,MARS	3.14969e-07	1.98813e-05
SPAG5,ANLN	4.60459e-12	1.98967e-05
RAMP2,APLNR	1.98139e-08	2.01286e-05
FUT3,SLPI	9.572e-09	2.09619e-05
GAS2L3,STARD8	8.03346e-09	2.11832e-05
ABCF2,SARS	3.30011e-07	2.13183e-05
SHCBP1,KIF14	1.80458e-08	2.20769e-05
RHOB,PIM3	5.61068e-12	2.2248e-05
NSF,CTR9	4.83093e-09	2.23518e-05
LIPA,SLC7A7	6.62392e-14	2.23661e-05
MNT,SKI	2.75289e-08	2.24795e-05
ENOX2,VPS35	1.1481e-10	2.25809e-05
NUPR1,ADM2	3.15397e-14	2.27718e-05
NARF,TLE3	2.29361e-07	2.28427e-05
TRIB1,HK2	3.17523e-07	2.30771e-05
FLT4,ALS2CL	2.74987e-08	2.32368e-05
ACLY,CAP1	5.48144e-12	2.32452e-05
TACSTD2,TFAP2C	2.00646e-08	2.33099e-05
SPAG5,PRC1	3.55825e-14	2.33108e-05
SLITRK1,SYNPR	3.66837e-07	2.33171e-05
CKAP2L,SHCBP1	1.60864e-08	2.38248e-05
ACTR3,AFTPH	1.35287e-08	2.38485e-05
ANKS4B,TTR	8.58766e-12	2.40127e-05
SPAG5,CCNA2	4.73321e-08	2.41465e-05
YARS2,ARMC6	2.1323e-07	2.42344e-05
KIF23,ESPL1	1.89685e-08	2.42477e-05
SPINT2,PKP3	2.48019e-07	2.50664e-05
G3BP1,MAT2A	1.97214e-07	2.50676e-05
ALS2CL,EPS8L1	3.14742e-09	2.50837e-05
ADCY4,IDUA	5.33567e-11	2.50914e-05
FDPS,SEC13	3.49498e-07	2.52268e-05
SPAG5,MELK	1.1812e-08	2.52838e-05
NOTCH1,RAVER1	6.04681e-12	2.56118e-05
DEPDC1B,ATAD2	6.46843e-12	2.58246e-05
MLLT1,SKI	3.9358e-07	2.64186e-05
FAM83D,KIF23	7.41075e-09	2.65625e-05
CAP1,ACTB	1.97142e-08	2.6756e-05
SLPI,ATP2C2	3.57786e-07	2.69752e-05
NOS3,TINAGL1	6.41978e-08	2.75474e-05
ZNF395,SLC2A1	1.24806e-10	2.79935e-05
DHTKD1,CHEK2	1.82977e-09	2.84393e-05
CLRN3,TTR	5.15134e-11	2.96161e-05
ALDOC,ACOT8	6.7363e-09	2.99967e-05
ATP6V1D,VPS26A	2.60105e-07	3.04717e-05
LDHA,P4HA2	1.29425e-20	3.0831e-05
ACVRL1,STARD8	1.62205e-07	3.17664e-05
ENOX2,RPA1	2.14348e-07	3.2304e-05
MKI67,SHCBP1	2.60945e-10	3.23492e-05
DDIT3,KLF10	2.62322e-11	3.2386e-05
LDHA,BNIP3	8.58731e-12	3.24669e-05
MPI,NFS1	6.31821e-15	3.25988e-05
NCAPH,SHCBP1	1.42402e-07	3.43763e-05
HJURP,SHCBP1	2.14645e-09	3.45927e-05
CLEC14A,ITGA8	7.77422e-11	3.46133e-05
S1PR1,SLC41A1	5.60734e-08	3.47187e-05
DDIT4,MARS	5.53567e-08	3.49698e-05
EME1,DEPDC1B	8.16437e-10	3.50029e-05
CYCS,DDX1	1.68955e-07	3.50904e-05
LCN2,ATP2C2	5.19263e-07	3.5408e-05
NUF2,ESPL1	9.24445e-08	3.60768e-05
MIA3,ELMO2	4.45596e-07	3.61985e-05
VPS35,ATP6AP2	4.72492e-08	3.63297e-05
INSIG2,AFTPH	2.20436e-07	3.68898e-05
PLIN2,ITGB1	1.14252e-07	3.75456e-05
TXNDC15,SLC25A12	9.93648e-09	3.76208e-05
FDPS,ATP5G1	3.59396e-08	3.77414e-05
NFIX,MXI1	4.19692e-07	3.80616e-05
ARL8B,YME1L1	6.7848e-08	3.81884e-05
RASIP1,TLE2	3.99968e-07	3.84014e-05
CXCL6,WFDC5	3.18484e-09	3.84508e-05
CMBL,DHRS11	1.62915e-07	3.86765e-05
FLT1,PELI1	8.29351e-12	3.89734e-05
S1PR1,KDR	3.46912e-09	3.93394e-05
OGFOD1,SRP68	1.88745e-10	3.98238e-05
MARS,SLC3A2	2.4735e-09	4.11013e-05
TEK,COL4A1	9.79393e-09	4.14892e-05
ITGA3,NPAS2	4.6846e-10	4.25149e-05
FLT1,NOS3	1.19146e-08	4.27797e-05
ENOX2,DOCK11	4.83852e-10	4.29817e-05
NFIL3,MXI1	6.76555e-08	4.30403e-05
PLVAP,ITGA8	2.6954e-09	4.43112e-05
DARS,MPI	1.09389e-08	4.50813e-05
LIPA,TMEM9B	8.09626e-10	4.51382e-05
WNT5A,PCDH18	1.10477e-07	4.51491e-05
DEPDC1B,KIF23	1.3166e-09	4.52319e-05
MPI,MECR	2.51872e-09	4.61865e-05
SHCBP1,EXO1	2.90648e-08	4.62401e-05
CLDN7,KRT19	7.78675e-08	4.67535e-05
PLEKHG2,ATXN2L	1.3142e-11	4.70007e-05
CENPF,ESPL1	1.66215e-08	4.73043e-05
CCDC12,SYF2	2.41486e-09	4.77104e-05
SPAG5,CCNB2	4.44804e-08	4.77902e-05
ALDH3A2,SUCLG1	3.35197e-08	4.7835e-05
LAMC1,PPIC	1.19269e-10	4.81953e-05
SASH1,HTRA1	2.37559e-14	4.8289e-05
PLOD1,SLC26A6	5.84229e-08	4.86235e-05
PCBP1,RNPS1	1.23056e-07	4.86288e-05
NDUFA5,TOMM20	1.0279e-07	4.86762e-05
LGALS4,AMT	1.1723e-10	4.90923e-05
DEPDC1B,BLM	3.96657e-12	5.03298e-05
ACLY,TRAF7	1.93021e-09	5.04237e-05
CAP1,SHKBP1	3.37743e-07	5.04866e-05
ENG,PTPN23	4.22601e-08	5.09564e-05
FAM160B2,PLEKHG2	1.26838e-12	5.19955e-05
NCAPH,DEPDC1B	2.36115e-09	5.25793e-05
SLBP,CUL3	4.45909e-09	5.29996e-05
HACE1,AGK	1.54626e-08	5.3013e-05
KIF20A,SPAG5	2.30786e-07	5.34505e-05
PKP3,CDS1	1.48821e-10	5.42931e-05
NARF,PPFIA4	4.3718e-09	5.46736e-05
STX12,BTBD1	1.32137e-08	5.55294e-05
DDX1,COQ3	2.78885e-07	5.67914e-05
CPT1C,BRSK1	4.25129e-10	6.07458e-05
GSTZ1,ALDH7A1	1.08961e-08	6.09601e-05
TMEM33,CCDC47	8.76734e-10	6.11984e-05
CDKN3,SHCBP1	8.73789e-08	6.1549e-05
SF3A3,OGFOD1	5.05494e-15	6.16574e-05
IQCE,SPA17	2.17378e-08	6.17277e-05
DDX10,TGS1	3.86546e-07	6.23385e-05
TPX2,ESPL1	6.80026e-09	6.28345e-05
RHBDF1,SPRY4	2.35346e-14	6.30038e-05
PFKP,P4HA2	2.83334e-21	6.33482e-05
RPA1,CKAP5	4.02859e-08	6.42484e-05
SF3A3,CDK5RAP1	7.02344e-08	6.42934e-05
PTGES,OSMR	2.55718e-07	6.44213e-05
ENO1,COX8A	1.28666e-07	6.4993e-05
KDELR3,P4HA2	1.23647e-09	6.65348e-05
NUPR1,PSAT1	3.92191e-14	6.67359e-05
PCOLCE,C1S	2.12775e-07	6.68138e-05
DECR1,DHTKD1	7.57827e-08	6.6941e-05
ACOT8,MPI	5.97772e-08	6.72654e-05
NOS3,PTPRB	2.37148e-07	6.83813e-05
FLT1,PFKFB3	4.25901e-21	6.86673e-05
SH2D3C,ABCA7	7.66669e-09	6.95604e-05
SPAG5,MCM2	9.07641e-11	6.96527e-05
FA2H,TMC5	1.23209e-07	6.97308e-05
POLQ,SHCBP1	3.15925e-07	7.08166e-05
BUB1,SHCBP1	4.44049e-09	7.0882e-05
COL4A1,PTPRB	3.60829e-07	7.09065e-05
PCBP1,RAB11B	2.68793e-08	7.14793e-05
WIPI1,DVL3	3.45596e-13	7.1753e-05
FLT1,SASH1	1.33539e-10	7.2814e-05
FDPS,FAHD2A	3.08285e-09	7.29437e-05
IPO9,ZWILCH	2.80552e-07	7.33855e-05
KIF11,DEPDC1B	1.13413e-09	7.37053e-05
KRT15,UPK1B	7.40888e-09	7.39961e-05
HAUS5,MCM5	5.10421e-07	7.48787e-05
IPO11,XPO5	5.14635e-08	7.61412e-05
CPT1C,KLC2	1.21253e-10	7.63476e-05
LDHA,VEGFA	1.38302e-14	7.65608e-05
SPAG5,EXO1	9.59663e-08	7.68066e-05
SPAG5,NUF2	1.42613e-09	7.70561e-05
APLNR,TEK	2.10113e-08	7.75573e-05
ESCO2,SHCBP1	2.23077e-09	7.9383e-05
PFKFB4,MBOAT7	1.09462e-07	8.05647e-05
ERRFI1,SDC4	2.27533e-08	8.12965e-05
NOTCH1,MLLT1	3.13272e-09	8.17112e-05
GDE1,BSG	2.58151e-09	8.22128e-05
SLC26A3,UGT2A3	8.13174e-09	8.23119e-05
ARID5B,ARRDC3	7.71124e-09	8.24635e-05
NDRG1,P4HA1	2.17706e-08	8.29136e-05
MPZL2,LCN2	5.94254e-10	8.48983e-05
UGT2B7,EPS8L3	8.8973e-17	8.52131e-05
BNIP3,SLC16A3	1.32504e-07	8.53073e-05
CSPG4,RHBDF1	2.22868e-07	8.53938e-05
PLEKHG2,ZNF707	3.43355e-11	8.59726e-05
ALS2CL,SSH3	6.47408e-17	8.62711e-05
COG4,FTSJ3	5.30715e-07	8.66531e-05
PTPRB,ECSCR	5.13387e-08	8.77279e-05
ENOX2,TRAF3IP1	2.75401e-07	8.92771e-05
PPFIA4,DARS	4.98992e-15	8.93908e-05
FDPS,NDUFA9	2.72317e-08	9.0555e-05
KIF20A,ESPL1	4.10792e-08	9.19356e-05
HOXA3,ADCY4	4.32162e-08	9.23774e-05
HOXA3,HOXD4	1.73783e-07	9.31173e-05
TTR,UGT2A3	1.25045e-10	9.41482e-05
E2F7,DEPDC1B	6.70166e-10	9.44406e-05
ENOX2,ATG4C	1.94525e-07	9.49164e-05
ACSS3,PLG	1.82556e-09	9.51624e-05
CTSB,GABARAP	1.3912e-10	9.52439e-05
TNS1,MXI1	4.7947e-09	9.69285e-05
ALDH7A1,BCKDHB	1.10027e-08	9.77943e-05
BTG1,AFTPH	1.39459e-09	9.90529e-05
DEPDC1B,KIF15	4.27625e-09	9.95641e-05
LCN2,ALOX5	2.31468e-07	9.97392e-05
SHCBP1,CDC6	1.96851e-07	0.000100579
SYNPR,ROBO2	6.38263e-09	0.000100741
RSU1,DNM1L	3.51843e-10	0.000101188
IDH1,ECHS1	1.34074e-12	0.000104475
MKS1,TCTN1	7.33401e-08	0.000105469
SPAG5,CDC45	7.6549e-11	0.000105998
SPAG5,HJURP	2.83903e-08	0.000106031
CD109,DOCK1	1.69458e-09	0.000106553
DCBLD2,ITGAV	6.27072e-09	0.000107794
NARF,PFKFB3	4.17649e-07	0.000109009
SLC25A10,FBF1	5.69544e-12	0.000109439
MXI1,MAP1LC3B	2.08797e-07	0.000109871
HOXA3,HOXD11	1.62143e-08	0.000110039
NOTCH3,RHBDF1	1.13564e-07	0.000110925
E2F2,SPAG5	1.73554e-07	0.00011179
KDELR3,WIPI1	3.02803e-08	0.000113144
RHOJ,SHROOM4	1.15369e-10	0.000113302
GULP1,RAI14	1.60351e-09	0.00011395
POLD3,ECT2	2.47806e-07	0.000115098
TFG,LDHA	1.51854e-07	0.000115733
FAM83D,TIMELESS	2.04945e-10	0.000116615
ADD3,ALDOC	4.3215e-15	0.000116872
PHLDA1,TNFRSF12A	1.91471e-07	0.000117177
PHKA2,INTS1	1.24429e-14	0.000117683
TRIM10,SPTB	1.86527e-09	0.000118125
NPAS2,P4HA2	5.86715e-08	0.000118466
LRIG3,SULF1	6.88006e-09	0.000118985
MIF4GD,GSS	3.6136e-17	0.000119188
LDHA,HIGD1A	3.71664e-11	0.000119708
KCNE4,EMCN	3.42931e-10	0.000120788
ABCB6,LONP1	1.98671e-08	0.000120829
TACC3,SPAG5	3.29178e-14	0.000122571
ZNF366,CD36	4.28091e-07	0.000122654
PLIN2,PFKFB3	7.57934e-25	0.00012281
PRC1,ESPL1	1.96161e-10	0.000123126
RPA1,ZWILCH	8.71256e-09	0.000125045
MPI,CA9	4.60557e-08	0.00012539
ALDH6A1,NIPSNAP1	1.72774e-07	0.000125397
TRAF3IP1,STK36	3.33867e-08	0.00012664
PLIN2,KLF10	1.35691e-09	0.000126705
C4orf3,PPFIA4	4.01081e-08	0.00012897
HOXA2,HOXD11	8.02944e-11	0.00012906
ALDH2,ALDH6A1	1.23054e-09	0.000130221
CEP55,DEPDC1B	1.02292e-08	0.000132448
APLNR,ECSCR	3.35461e-11	0.000134113
ADCY4,SEC31B	2.4882e-09	0.000135677
CD93,EMCN	2.31505e-09	0.000141723
EDIL3,DSEL	2.08492e-07	0.000141728
DEPDC1B,CDC7	1.27011e-13	0.000141886
C1orf53,CREG1	1.10613e-10	0.000143567
SIN3A,UBE2Z	1.28928e-08	0.000144721
ITGB1,ERRFI1	6.68541e-14	0.000147687
KIF2C,DEPDC1B	1.03928e-10	0.000148782
FLT1,FHL5	3.49856e-09	0.000151289
TUBG1,VPS25	1.17331e-09	0.000151442
PMPCB,TOMM20	1.29376e-07	0.000151878
EVPL,UPK1B	3.19092e-09	0.000152975
NDRG1,LDHA	8.90525e-14	0.000153222
REXO1,SKI	1.93335e-07	0.000153852
TFF1,UGT2A3	4.49151e-13	0.00015514
HOXC11,KCNE4	2.71476e-07	0.000155488
MIF4GD,SCRN2	1.38232e-15	0.00015553
YARS2,THG1L	4.19628e-07	0.000155935
CTSA,CAPN1	5.27874e-11	0.000155952
ZNF273,C18orf54	6.39156e-09	0.000157057
NOTCH4,SHROOM4	1.6237e-08	0.000157691
ALDH3A2,GEMIN4	1.12045e-07	0.000158669
SAP30,H2AFX	5.03809e-07	0.000159521
UPK1B,WFDC5	2.83499e-14	0.000159834
C1orf43,PCCB	1.0801e-09	0.000160376
IDH3A,DDX1	5.23171e-07	0.000163252
MNS1,CCDC34	3.1979e-11	0.000163305
PDIA6,ATP6AP2	1.00853e-07	0.000163398
TACC3,FAM83D	8.17125e-12	0.000163538
PLIN2,PFKFB4	4.23885e-13	0.000164373
GPR4,PTPRB	2.63701e-08	0.000164923
DTL,SHCBP1	3.58783e-08	0.000164961
DNM1L,DHX9	2.57062e-07	0.000165067
ARHGAP1,POLDIP2	2.7371e-09	0.00016684
PLEKHG2,ATN1	4.03018e-11	0.000169938
SLC9A1,WASF2	1.01128e-07	0.000170038
DEPDC1B,MELK	5.59356e-09	0.000170775
USP35,PLEKHG2	1.53562e-08	0.000171466
HNF4A,TTR	4.28388e-10	0.000171908
ITGB1,PPIC	7.43533e-14	0.000173189
PKP3,SPINT1	6.07995e-09	0.000173321
ASNS,PMPCB	2.70329e-07	0.000173462
ADD3,UTRN	1.13446e-13	0.000176116
DNAJB4,ARL8B	1.78483e-07	0.000177819
KPNA2,SHCBP1	1.20495e-07	0.000178148
LDHA,CFL1	2.69302e-09	0.000179103
KDR,FAM124B	1.9402e-09	0.000179402
MLKL,TCHP	4.39162e-09	0.000179926
ACOX1,RNF185	4.24913e-10	0.000180033
MSH3,PNPO	2.99992e-11	0.000180083
PIGK,ATP6AP2	8.49953e-09	0.000184392
ANXA2,COPB1	8.37563e-08	0.000186136
UPK1B,CYP3A7	2.4496e-08	0.000186523
EPRS,THUMPD3	1.55457e-09	0.000188422
APOL3,CASP7	1.81092e-09	0.000188859
HSPA12B,APLNR	1.31301e-10	0.000189434
KIF4A,SHCBP1	8.15668e-08	0.000190004
EHHADH,BCKDHB	9.10403e-08	0.000190067
RFWD3,SLBP	2.55383e-09	0.000190475
SHCBP1,CDC20	4.20114e-08	0.00019084
KCNE3,FAM124B	9.36495e-11	0.000191568
GPC1,PFKP	9.30833e-09	0.000191751
GIMAP8,GJA4	3.43774e-09	0.000193598
KIF2C,FAM83D	6.26644e-09	0.000193866
HTRA1,TXNDC15	1.21966e-12	0.000195304
SLC22A17,ELOVL4	7.02704e-11	0.000195714
NEK2,SHCBP1	1.00049e-08	0.000196879
CYB5B,ANP32E	9.18877e-10	0.000197146
APLNR,MYCT1	4.25622e-09	0.000197699
GSS,G6PC3	1.16121e-10	0.000199146
FAM83D,CHAF1B	1.35749e-10	0.00020184
SPAG5,RAD51	1.76315e-14	0.000202709
MPI,FOXRED1	1.15703e-10	0.000203411
KDR,PLVAP	9.64657e-08	0.00020405
ANGPTL4,RHBDF1	4.49015e-09	0.000204534
MYBL2,SHCBP1	1.96242e-10	0.000204799
ASPM,FBXO43	4.33122e-07	0.000207035
NRP1,STARD8	3.46288e-09	0.000207258
PER2,RNPS1	2.52565e-07	0.000209145
IDH3A,STX12	1.32304e-08	0.000209969
NOTCH1,REXO1	6.69535e-08	0.000210337
RBBP7,HAT1	4.89525e-07	0.000213531
PPID,GDI2	4.80646e-09	0.000214043
SPAG5,SHCBP1	1.10902e-08	0.000214763
PKP3,PRSS22	1.04787e-07	0.000216019
NRM,KNTC1	5.73898e-08	0.00021718
SLC2A1,BNIP3L	1.03243e-07	0.000217747
C1orf43,RBM22	1.61519e-07	0.000222117
APLNR,FHL5	9.88267e-12	0.000224126
RAVER1,SKI	1.97898e-08	0.00022443
PKP3,MAL2	2.91731e-07	0.00022596
ABCF2,SF3A3	5.02033e-08	0.000226052
TINAGL1,ESAM	4.56506e-10	0.000226222
UBE2T,FAM83D	9.26509e-08	0.000226543
ICAM1,PIM1	2.90254e-08	0.000227223
SLITRK1,CACNG7	2.46583e-08	0.000227647
SPRED1,ETV4	3.48763e-10	0.000227876
HSPA12B,EMCN	3.62002e-10	0.000228763
MNS1,KNTC1	3.41799e-07	0.000229027
DBN1,ACTN1	9.77225e-08	0.000237163
UGT2A3,ISX	2.10791e-09	0.000242377
ERCC6L,SHCBP1	3.78035e-07	0.0002424
RAMP3,GPR4	1.79873e-09	0.000242439
ATP5E,RPL22	7.14286e-09	0.000242924
DHTKD1,LMNB1	2.57259e-07	0.000244292
DDX20,YARS2	1.43388e-10	0.000247493
GEMIN5,GSPT1	1.53714e-07	0.000247744
STYXL1,NADSYN1	1.31738e-08	0.000249012
BST2,CASP7	6.1322e-08	0.000253132
PFKFB3,BNIP3	4.14687e-19	0.000254088
MPI,TM7SF2	7.66048e-10	0.00025469
FGD3,SNX20	2.54234e-07	0.000255879
DET1,MKS1	1.56494e-07	0.0002571
GBP1,TLR3	1.71804e-07	0.000258289
ALAD,SMPD1	6.17164e-09	0.000259791
CTSA,SCAMP4	1.74191e-07	0.000261467
CP,PLG	4.04844e-08	0.000261801
GCDH,RRP9	3.29626e-07	0.000262517
DEPDC1B,CENPO	6.31146e-10	0.000263082
ACLY,IPO9	1.60092e-10	0.000263488
SPAG5,UBE2T	1.60066e-07	0.00026472
ELMO2,WAC	1.07849e-09	0.000265683
APLNR,KIF26A	3.61136e-12	0.000266614
NOTCH1,CSNK1G2	1.23817e-08	0.000267301
NUP88,HSPD1	3.01331e-09	0.000268487
PLEKHG2,TCF3	2.55697e-08	0.000268808
SH3GLB1,PCBP1	1.01139e-07	0.000268891
SPAG5,CENPK	5.52935e-14	0.000270632
MCM6,SHCBP1	1.21571e-10	0.000271738
DEPDC1B,RFC5	1.68022e-08	0.000272235
VCL,CAPN1	6.43799e-08	0.000273067
ITGA5,SLC39A13	8.1053e-08	0.00027343
UBE3C,COPA	1.55391e-07	0.000274662
IQCK,ALDH7A1	1.6723e-07	0.000275047
SPON2,COL15A1	4.88564e-12	0.00027558
BEND3,G3BP1	2.77211e-07	0.000276188
TINAGL1,SOX17	8.04339e-08	0.000277913
EPS8L1,ATP2C2	8.11104e-10	0.000277918
SMPD1,MFSD5	3.79536e-09	0.000277932
ACAA2,GCDH	4.45718e-12	0.00027824
CETN2,SKP1	3.21591e-07	0.000279198
TMEM45B,CD5	1.93722e-07	0.000280734
APLNR,CD34	9.25852e-10	0.000281927
DEPDC1B,KIF18A	2.68503e-07	0.000282166
SOX18,RHBDF1	7.55167e-08	0.000283621
NBEAL2,PHKA2	1.49765e-10	0.000285436
SLC25A3,SNRPB	3.31261e-11	0.000291102
DEPDC1,SHCBP1	3.76547e-08	0.000294547
TGFB1,REEP4	1.02528e-09	0.000295345
ENOX2,NUP133	1.26824e-07	0.00029717
ETV4,CDK5RAP1	1.81491e-11	0.000299142
UBE3C,PIGN	2.3956e-07	0.000302654
PLXNB1,SOX13	5.39857e-08	0.000302721
CASC3,RNF10	5.35335e-09	0.000302831
PLIN2,ELF1	1.33603e-10	0.000305499
HSPA12B,KDR	1.39422e-08	0.000307734
TNS1,PLVAP	4.14622e-07	0.000308485
SPAG5,RFC4	1.36508e-08	0.000309176
XRCC5,SARNP	4.90605e-09	0.000309199
SCAF1,SKI	5.41555e-09	0.000312322
POLR3B,DHX57	3.74273e-08	0.000313062
OXSM,FPGT	6.33932e-08	0.000313644
HMGB3,RBM8A	2.80819e-13	0.000318335
SPINK1,UGT2A3	1.00336e-11	0.000318929
PSME3,HNRNPK	9.75823e-08	0.000319964
LRIG3,COL8A1	2.30703e-07	0.00031999
PTAFR,SYK	3.89599e-08	0.000320194
SFXN2,SHMT1	5.27252e-09	0.000320212
SPAG5,NCAPG	3.11001e-08	0.000320339
FDPS,TM7SF2	1.299e-11	0.000320369
YY1AP1,RNF10	2.61701e-09	0.00032061
IPO9,DNAJC9	1.36273e-07	0.000325432
INPPL1,CCDC142	5.23175e-09	0.000326324
CAP1,DBNL	7.34733e-08	0.000327924
ALAD,HAGH	5.92795e-08	0.00032921
ALDOC,NARF	3.18164e-11	0.000329518
ATXN2,SOS1	3.20629e-07	0.00032989
UBL3,LMBRD1	5.21068e-08	0.000332317
TMC5,ADIPOR1	3.74451e-08	0.000334486
SKA3,SHCBP1	1.21312e-09	0.000334907
CEP55,SHCBP1	3.68469e-09	0.0003389
GOT2,PSMD7	9.62758e-10	0.000338978
LDHA,TXNDC17	5.19997e-08	0.000340983
CLPB,MTHFD1	3.46421e-09	0.00034117
H3F3B,GABARAPL2	1.90319e-08	0.000342089
TMEM184A,HNF4A	5.22728e-08	0.000343687
PFKFB4,BNIP3	3.70551e-08	0.000344924
GNAI3,TWF1	1.89071e-11	0.000347532
ITGA5,TNFRSF12A	3.79306e-07	0.000348202
SAP30,REEP4	2.86055e-10	0.000350696
GRB2,TMUB2	1.6291e-09	0.00035089
PCCB,SHMT1	7.35681e-10	0.000352214
GALC,GLT8D1	4.86538e-07	0.000355969
KIFC1,DEPDC1B	7.3284e-08	0.000358442
ADCY4,TTLL3	1.0374e-09	0.00035909
DNAJC9,MSH2	4.66189e-08	0.000360821
SIPA1L2,PFKFB3	1.98831e-12	0.000361284
G3BP1,ACLY	7.29434e-09	0.000363182
SLC26A6,GLB1	6.88826e-09	0.000364446
FGD3,NCF1	1.78962e-08	0.000365406
FANCD2,DEPDC1B	2.44149e-13	0.000365855
BRD7,SMC3	3.9883e-08	0.000366427
AKAP8,E4F1	1.56653e-08	0.000367528
DNM1L,DIS3	8.63163e-08	0.000368387
SHROOM4,TIE1	7.69693e-08	0.000368842
BIRC3,PMAIP1	5.61462e-08	0.000373076
CYYR1,APLNR	1.60134e-15	0.000378634
CCDC74A,LRRC23	5.12885e-07	0.00038113
KDM2B,DDX28	1.32555e-10	0.000381556
NOTCH1,RFX1	5.09164e-07	0.000384931
ACACA,IPO11	4.16333e-07	0.000385107
ITGAE,PLA2G2D	9.73871e-09	0.000385625
ECHDC1,BCKDHB	1.1211e-07	0.000385977
SNRNP25,AIFM1	3.12695e-07	0.000386009
CYSLTR1,CD36	3.61181e-15	0.00038737
POLD1,TCF19	1.52561e-08	0.0003887
LCN2,CFB	2.47021e-11	0.000392431
ASF1B,SHCBP1	1.20775e-08	0.000393807
HOXA3,MMP7	5.3288e-09	0.000394168
C1S,SVEP1	6.31809e-09	0.00039418
NCKAP5L,SKI	4.38617e-07	0.000395392
MXI1,VEGFA	8.95161e-09	0.000395572
SPAG5,CENPO	6.53762e-08	0.000395636
SLBP,RPA1	4.11731e-13	0.000396628
POLN,STK36	2.69722e-07	0.000397896
SARNP,SF3A3	5.93631e-08	0.000397945
FDPS,APEH	5.32298e-10	0.000400667
SPAG5,CENPF	2.80817e-11	0.000401206
C2orf81,TCTN1	3.93578e-08	0.000402722
RNF44,POGZ	2.17109e-07	0.000402795
SPAG5,PLK1	4.4733e-08	0.000404312
SPON2,SPARC	1.32967e-10	0.000405199
C1orf53,FPGT	5.91539e-09	0.000405302
PPP1R14B,LETM1	8.65714e-09	0.000405605
ADIPOR1,RIT1	4.07269e-07	0.000407861
APLNR,PECAM1	3.3893e-10	0.000408356
HIGD1A,C4orf3	2.80422e-08	0.000410393
ALDH1A3,TINAGL1	4.61988e-10	0.000412606
SHCBP1,AURKB	2.77852e-07	0.000414586
CNTNAP5,ELAVL3	2.12554e-09	0.000415976
GDE1,BNIP3L	3.31992e-07	0.00041637
OAZ1,PGAM1	9.05303e-08	0.000416953
KDELR3,NUCB2	2.28725e-07	0.000417602
ENO2,KLC2	3.11699e-09	0.000420504
WIPI1,GLT8D1	6.34498e-09	0.000421328
GJA4,KDR	5.06309e-14	0.000422539
FMOD,SVEP1	3.28807e-07	0.000425211
NOTCH1,TCF3	2.55969e-08	0.000426794
KIF2C,ESPL1	1.75131e-09	0.00042819
SPAG5,SKA1	5.71217e-08	0.000429212
ERAL1,ARHGAP1	1.89438e-08	0.000429952
GRSF1,CUL3	2.77798e-09	0.00043135
PLIN2,ETF1	3.21168e-07	0.000434538
GSS,CAPNS1	2.03465e-08	0.000434781
RCN1,ARMCX3	8.55129e-09	0.00043687
BCKDHB,SHMT1	7.31301e-10	0.000436887
C11orf54,BCKDHB	5.15352e-09	0.000437323
SPAG5,CDCA8	3.30319e-13	0.000440152
SPON2,S1PR5	3.89516e-08	0.000441276
ZNF395,RPL22	1.04239e-10	0.000441452
FCN3,ZNF366	1.16473e-07	0.000445719
HSF4,NRBP2	6.79211e-08	0.000448255
TACC3,ESPL1	3.54679e-12	0.000450238
GRSF1,TSN	3.66659e-11	0.000451106
HADH,DHTKD1	1.7981e-08	0.000453161
HTRA1,SPOCK1	4.95239e-07	0.000454052
MRPS25,RABGGTB	6.00962e-12	0.000454766
MYL12B,TAGLN2	2.53747e-07	0.000456942
MAT2A,TSR1	1.30776e-08	0.000460087
TTR,SERPINA6	2.11905e-09	0.000461106
PECAM1,SLC7A7	2.6407e-07	0.000463067
ENO1,ATP5A1	1.92067e-07	0.000463144
GJA5,HSPG2	4.64329e-08	0.000463545
MGST1,PHYH	4.67624e-14	0.00046509
DDIT3,NFIL3	5.05002e-09	0.00046611
NOTCH1,SNAPC4	8.52196e-08	0.000467666
YARS2,RBM19	1.00089e-11	0.000468095
ENO1,COX4I1	4.88909e-07	0.000468899
CKS1B,PRR11	3.02627e-08	0.000469613
STX12,HIGD1A	3.51304e-16	0.000470808
KLF10,IFRD1	6.98628e-08	0.000471053
CPT1C,CCDC74A	3.76929e-07	0.000471496
DNASE2,ESYT1	1.37509e-08	0.00047332
SHCBP1,DLGAP5	1.16623e-08	0.00047603
IFRD1,PELI1	3.9991e-07	0.000477995
GRB2,MTMR14	4.79381e-07	0.000483129
TKT,GDI2	2.03932e-09	0.000483822
LDHA,SEC23A	2.04643e-08	0.00048467
FLT1,BCL6B	5.1697e-10	0.000485343
SPON2,C6orf226	2.11786e-08	0.000489553
SLC11A1,FTL	2.49354e-09	0.000490028
FDPS,PCYT2	3.37836e-07	0.000490226
PLK1,DEPDC1B	5.65044e-08	0.000490364
DCTN2,CCNDBP1	3.34814e-11	0.000490646
HOXA3,HOXD3	1.22704e-10	0.000497078
KLF10,VEGFA	3.13619e-08	0.000502425
PPIC,OSMR	5.67482e-09	0.000502802
NOS3,EMCN	5.0213e-14	0.000504803
PLA2G15,PLOD1	3.06135e-10	0.00050504
CDC42BPA,ACACA	5.30831e-07	0.000507717
S1PR1,ADD3	1.17002e-09	0.000507734
ENO1,ATP5B	8.92064e-08	0.000508644
ARL8B,MARCH7	3.92033e-07	0.000510007
SHMT1,ZWINT	3.72427e-08	0.000518365
HMOX1,LIPA	2.32436e-11	0.000520946
P4HA2,TMED3	2.93762e-09	0.000520985
DHCR7,NADSYN1	1.26044e-07	0.00052507
ATAD2,ESPL1	8.17916e-08	0.000526118
AQR,DHX8	6.20519e-08	0.000527802
GJA1,SLC2A1	5.61283e-11	0.000535921
HAUS5,TCF19	5.01837e-09	0.000538352
CAP1,CMTM6	1.10108e-07	0.000540332
SPAG5,ATAD2	7.95844e-14	0.000540402
ANLN,ESPL1	1.17851e-08	0.000541177
LDHA,LLPH	4.36083e-08	0.000541849
DEPDC1B,CCNA2	2.44589e-07	0.000543997
CFB,SERPINA6	1.14323e-08	0.00054535
TNFRSF9,KLHDC7B	2.47245e-07	0.000553282
YY1AP1,RNPS1	7.4009e-08	0.000555162
ACTR3,ACTB	2.01579e-07	0.000559351
SPAG5,PLK4	1.67719e-10	0.000563138
NSF,SRP54	3.64261e-07	0.00056475
PDK4,ADD3	1.13643e-08	0.00056622
SPAG5,UHRF1	2.28515e-07	0.000567069
APEH,MPI	2.63817e-11	0.000574911
RPA1,CEP78	4.39209e-09	0.000578052
STX12,MAP1LC3B	2.14586e-10	0.000578057
RRM2,SHCBP1	4.51929e-10	0.000578603
PLEKHG2,DBN1	6.59049e-12	0.000582479
CKAP2,SHCBP1	4.61356e-09	0.000584299
CALCRL,STARD8	1.19064e-08	0.000587958
MYT1,KIF1A	3.69023e-07	0.000593048
ALDH3A2,NFS1	1.56316e-11	0.000595392
HJURP,ESPL1	5.87553e-08	0.000595735
PFKP,ACLY	1.56904e-15	0.000599862
SPARC,TXNDC15	1.29475e-11	0.000600257
APLNR,SOX17	1.80527e-22	0.000601999
EMCN,FHL5	6.26592e-09	0.000603863
ANXA11,CTSA	1.89553e-10	0.000604485
RPL22,UQCRB	5.20771e-08	0.000606743
GLB1,ACAD10	2.68429e-08	0.000611902
PLA2G15,HMOX1	4.46966e-09	0.000612535
APLNR,SOX18	1.86762e-09	0.000613712
FASTKD5,ARPC5L	4.99985e-07	0.000616669
ALAD,TST	6.29331e-08	0.000619897
HOXA3,HOXD9	1.05676e-08	0.000621935
MGAM,CD93	3.92125e-08	0.000623377
DCTN2,OAZ2	5.24587e-10	0.000624984
SLC39A5,TTR	5.24361e-12	0.000626517
UBE2Z,ARCN1	1.21574e-07	0.000630617
PDRG1,AAMP	1.88408e-07	0.000634461
THUMPD3,CSE1L	8.46124e-08	0.000636385
CYYR1,SHROOM4	6.57182e-10	0.00064124
HNRNPD,PPM1G	3.33212e-08	0.000643759
ABCB6,HAGH	2.50596e-07	0.000651092
RNF19B,ADAR	5.77351e-10	0.000652659
CFL1,RSU1	2.94669e-07	0.000654389
TPX2,DEPDC1B	8.93568e-08	0.000655813
CAP1,CALM2	2.0415e-12	0.000660673
ATP5E,RPS27A	4.86202e-08	0.000661609
FANCI,DEPDC1B	1.35179e-11	0.000663854
CLDN4,FXYD3	3.61905e-10	0.000663996
MORF4L1,RAN	1.30255e-07	0.000664048
SAMHD1,UTRN	3.89087e-09	0.000668782
SHMT1,TK1	9.54661e-12	0.000669607
EHHADH,IVD	3.51722e-13	0.000669918
PLAC9,TEK	2.10023e-09	0.000672399
PLIN2,PDK4	4.26021e-07	0.000676377
HSPH1,DNAJB4	5.27345e-08	0.000678112
ALDOC,BNIP3	2.16089e-08	0.00068728
HMGB2,MNS1	8.38148e-08	0.000687986
IQGAP3,SHCBP1	8.92861e-12	0.000689703
DNM1L,HNRNPR	1.73505e-07	0.000690077
CDKAL1,DLAT	8.55269e-08	0.000692187
FAM124B,EXOC3L2	1.57973e-09	0.000695073
DEPDC1B,NUF2	5.72501e-08	0.000695529
SLC3A1,ISX	1.14109e-07	0.000698395
FCER1A,SEZ6L	3.40729e-07	0.000699382
SLC3A1,TTR	5.86393e-08	0.000700908
CBX1,MAGEF1	3.10448e-07	0.000701408
ALDH6A1,ALDH4A1	2.60011e-07	0.000704554
SNX33,INPPL1	2.90212e-07	0.000704858
APLNR,NOS3	3.41628e-15	0.000705514
ALDH7A1,DCXR	1.0525e-14	0.000711887
CDCA3,ESPL1	1.18454e-07	0.000712563
CETN3,CLUAP1	1.28481e-09	0.000714641
CDCA7,SPAG5	5.63134e-08	0.000717591
WIPI1,P4HA2	1.55094e-19	0.000718877
CLSTN1,ATP6AP1	3.01545e-07	0.000721155
DEPDC1B,TK1	2.54125e-13	0.000725629
SCAMP4,SMPD1	2.63058e-07	0.000728375
PBK,SHCBP1	1.47073e-07	0.000730947
DHTKD1,ACAD10	1.86492e-07	0.000737442
MSH3,NFS1	1.53503e-07	0.000740162
MNT,KLHL21	4.02106e-11	0.000744278
DOCK1,MSRB3	1.09395e-07	0.000745194
SPAG5,CDCA5	8.53776e-13	0.000747077
ENO1,PPFIA4	3.76525e-21	0.000747973
PDHB,DDX1	5.34049e-07	0.000752658
NPM3,RPS27A	1.17884e-08	0.000757313
NID1,CD36	2.50365e-09	0.000759418
GPT2,STC2	2.16449e-13	0.000759946
ASNS,LONP1	2.12557e-11	0.000762563
PSMD11,CSE1L	5.29566e-07	0.000764702
NDC80,SHCBP1	1.04309e-08	0.000768713
SCARB1,OXA1L	3.33222e-08	0.000769358
CPN2,ACSS3	1.88424e-11	0.000770348
CHAF1B,WDR34	1.51194e-08	0.000770956
NUP93,HNRNPR	1.80205e-08	0.000772252
ADAMTS4,STARD8	2.99975e-07	0.000772921
CEBPZ,HSP90AA1	1.5103e-07	0.000774462
CENPI,SHCBP1	2.17074e-07	0.000777246
HMGB3,LMNB1	9.01334e-08	0.000779624
PLIN2,TMED5	1.14786e-07	0.000780239
NIPSNAP1,ST13	2.72161e-07	0.000781021
ALAD,GCDH	6.06326e-14	0.000788458
AK1,ADIPOR1	1.49066e-13	0.0007951
HMGB3,EBP	8.752e-09	0.000796396
PCBP1,WAC	7.12038e-09	0.0007979
ADAMTS4,SPHK1	8.05356e-08	0.000800532
CYCS,PTP4A1	2.19919e-07	0.000801883
ZWINT,ESPL1	2.95947e-11	0.000807273
ALDH1A3,GRB7	2.46421e-07	0.000809121
SHMT1,ACAT1	1.50948e-12	0.000812159
ESPL1,MCM5	1.60207e-11	0.000826956
TRMT5,NOL11	1.74324e-07	0.000829061
GALC,BTBD1	1.12649e-07	0.000838036
ITGA5,P4HA2	9.82539e-11	0.000840156
ERBB3,DOCK1	2.50663e-09	0.000847291
PLEKHB1,SALL2	3.61423e-08	0.000849676
GIMAP8,NOS3	2.72602e-07	0.000850434
MAP2K1,SRP68	1.92231e-12	0.000851454
SUPT4H1,RNF185	2.01174e-07	0.000851503
PTPRB,GJA4	4.28586e-10	0.000855267
SRP14,MRPL33	1.97355e-09	0.000855597
BBS12,ATP6V1D	2.01295e-07	0.000859757
FDPS,LSM4	9.12234e-10	0.000860528
FGD5,RENBP	6.73344e-13	0.000861
CYYR1,FLT1	4.37732e-10	0.000867633
RAMP3,NOS3	3.48264e-09	0.000868853
EME1,ESPL1	6.18635e-09	0.000869596
E2F7,ESPL1	7.2739e-08	0.000873667
FLT1,PLVAP	3.43554e-07	0.000875942
MLKL,NBEAL2	1.20683e-08	0.000877407
PNRC1,MXI1	4.73388e-10	0.000878173
EIF2AK1,NCOA4	1.34644e-07	0.000878238
DDX1,GRSF1	3.73048e-11	0.000880094
C1orf43,SEC13	4.96978e-11	0.000882061
FAM98A,USO1	4.32782e-07	0.000884224
G3BP1,OGFOD1	1.56515e-09	0.000888143
GATA2,KRT19	9.2159e-10	0.000889204
AGXT,TTR	5.98844e-10	0.000890293
CENPN,BUB1B	3.1734e-07	0.000899576
SPAG5,CENPN	3.18793e-08	0.000900331
CCNDBP1,TMUB2	1.29347e-12	0.000910127
SPAG5,PTTG1	3.64749e-15	0.000912959
SGSM3,ACAD10	1.10585e-07	0.000928743
BCL6B,KDR	1.42795e-10	0.000929399
C5orf56,C19orf66	1.53866e-07	0.000929827
DOCK10,APBB1IP	7.41652e-10	0.000931743
CERCAM,SPOCK1	6.80968e-08	0.00093828
STC1,P4HA2	7.05569e-09	0.000938716
H2AFZ,SPAG5	4.55779e-07	0.000940806
CYYR1,STARD8	2.11058e-07	0.000949893
EDN1,CALD1	1.14392e-07	0.000952549
GIMAP8,PLVAP	4.12273e-07	0.000952698
PLA2G15,PCYOX1	9.75298e-08	0.000963089
PLIN2,SAP30	1.26807e-08	0.000964981
ZWILCH,DEPDC1B	1.48051e-09	0.00096739
FOXRED1,NAA40	1.87424e-07	0.000975016
FAM83D,PTTG1	1.23492e-11	0.000977018
SLC25A25,RHOB	8.87361e-11	0.000978881
ASNS,SLC3A2	7.13129e-14	0.000979376
PLK1,ESPL1	2.20492e-08	0.000981124
TAPBP,NLRC5	1.38468e-08	0.000985592
SPAG5,CDCA3	5.46077e-08	0.000987268
RPA1,VRK1	5.34058e-08	0.00099444
CLRN3,ECHS1	5.98297e-08	0.000995797
SKI,ULK1	8.18334e-08	0.000996513
EMCN,ECSCR	5.44697e-08	0.00100243
SPRED1,DOCK1	2.76062e-09	0.00101317
SYT3,REEP6	7.70858e-13	0.00101664
B3GNT3,TMC5	3.60892e-09	0.00101704
TES,TAGLN2	2.93882e-11	0.00101747
CETN2,IQCE	2.35391e-07	0.00101983
PDIA6,CYP51A1	3.44081e-07	0.00102139
MPI,FAHD2A	6.15442e-08	0.00103138
PGAM1,NDUFA4	5.57229e-08	0.00103166
CBX1,CCDC34	3.84384e-09	0.00103184
GRIK5,TMEM63C	9.19068e-08	0.00103289
ANGPTL4,SDC4	1.66655e-07	0.00103326
GLO1,CYCS	5.08937e-07	0.00103684
AFTPH,PLEKHB2	6.40063e-09	0.00104395
DNTTIP2,PSMD6	5.50454e-10	0.00104698
HOXC13,IGFL1	6.06373e-09	0.00104775
PLOD1,AP2M1	4.64372e-07	0.00105325
KLK11,VGLL1	2.96704e-10	0.00105386
ACLY,TKT	1.22805e-13	0.00106326
ACSS2,ALAD	3.26226e-09	0.00106834
CCDC12,IK	7.80388e-08	0.00107132
LETM1,RNPS1	2.44904e-08	0.0010735
NT5E,SP100	4.41777e-09	0.00107409
HMOX1,VPS18	8.69532e-08	0.00107684
ALDOA,LDHA	1.29036e-07	0.00107747
NEIL3,SHCBP1	8.90622e-08	0.00107946
PFKFB4,TMEM8A	1.33372e-08	0.00108718
PLG,TTR	6.04979e-10	0.00108983
CYYR1,PTPRB	4.36812e-08	0.00109062
SPAG5,KIF2C	8.6548e-12	0.00109079
TXNDC9,SRP54	2.99392e-08	0.00109256
INSIG1,IBTK	1.51296e-07	0.00109593
IL11,ENO2	5.09978e-10	0.00109637
CYYR1,KDR	3.62215e-11	0.00109746
PIM1,BTG1	2.4828e-08	0.00110179
TINAGL1,TIE1	1.93533e-09	0.00110528
EDN1,TINAGL1	3.13183e-12	0.00110811
CDCA8,DEPDC1B	4.91222e-10	0.00111056
ZWILCH,ANP32E	2.85896e-09	0.00111157
CLRN3,ISX	8.74301e-12	0.00111626
FGGY,ACAD10	3.56489e-10	0.00112056
APLNR,BCL6B	9.50943e-13	0.00112184
GRB2,CALM3	5.47434e-11	0.00112215
SPAG5,ERCC6L	2.22966e-07	0.00112276
CCNE2,SPAG5	1.14832e-08	0.00112404
ANKRD13D,PFKFB4	1.49838e-10	0.0011248
ADCY4,DNAH1	6.01771e-08	0.00112499
APLNR,GPR4	9.1466e-15	0.00113569
SPAG5,GINS4	3.78107e-07	0.00113674
APLNR,PLVAP	3.19507e-11	0.00114148
ZNF154,ZNF136	9.78098e-08	0.00114252
HNF4A,ISX	8.46836e-12	0.00114358
DEPDC1B,TTK	1.46412e-07	0.00114694
NARS,TIMM44	2.14086e-09	0.0011565
FDPS,SLC25A3	8.16359e-09	0.00115685
ECHS1,ALDH6A1	2.17439e-09	0.00116137
SHROOM4,ECSCR	4.87651e-07	0.0011624
WIPI1,DCTN2	1.56016e-09	0.00116547
TRIM59,DEPDC1B	3.95035e-08	0.00117007
CD22,P2RY8	3.29713e-07	0.00117244
CLEC14A,APLNR	6.73331e-14	0.00117377
EMCN,RUNX1T1	1.96342e-07	0.00117558
SLC38A7,DHX57	3.85661e-07	0.0011816
SHCBP1,ARHGAP11A	3.41109e-08	0.001183
SLC25A3,RPL22	3.85616e-08	0.00118619
VEGFA,LONP1	8.83558e-10	0.00118696
C4orf3,SPCS1	4.15151e-08	0.00118954
UHRF1,SHCBP1	6.21232e-09	0.00119095
C11orf54,UBXN4	3.30773e-08	0.00119545
SPAG5,CDC6	4.75258e-15	0.00120998
ECSCR,STARD8	3.84115e-09	0.00121264
TPX2,FAM83D	1.15025e-07	0.00121271
SPAG5,MAD2L1	5.82626e-08	0.0012151
TTC30A,LCMT2	4.17415e-07	0.00121841
PSME3,XRCC6	3.68976e-07	0.00122311
INSIG2,PPFIA4	1.61944e-17	0.00123057
APLNR,GJA4	2.24826e-17	0.00123106
EPHA2,MAFK	2.74086e-09	0.00123114
PTTG1,ESPL1	4.08639e-11	0.0012322
TCTN3,GLB1	4.60965e-07	0.00123321
DEPDC1B,RAD54L	3.42306e-09	0.00123959
APLNR,NOTCH4	7.98478e-14	0.00123985
PFKM,PREPL	4.89562e-08	0.00124026
ATP6AP2,ITM2B	2.84981e-08	0.00124066
SERPINE2,ELOVL4	1.41236e-10	0.00124867
HIBCH,DYNC2LI1	1.50315e-12	0.0012565
C2orf48,CENPW	5.94904e-08	0.00125762
C2orf48,FANCD2	4.20032e-07	0.00125798
OLR1,SLPI	4.81298e-08	0.00126
EIF2AK1,MXI1	2.98756e-14	0.00126668
PLIN2,DDIT4	2.83495e-08	0.00126914
TXNDC15,CANX	1.27561e-10	0.00127141
PLEKHG2,KLHL17	2.37752e-08	0.00127212
C2orf48,PTTG1	4.44816e-07	0.00127385
MIF4GD,GRB2	4.85828e-11	0.00127581
CFL1,TPM4	4.59505e-08	0.00127601
TMEM104,SEC13	6.08755e-08	0.00128331
RAMP3,FAM124B	1.64001e-10	0.0012865
NAA40,IPO9	2.14603e-11	0.00128879
SLC26A3,ANKS4B	2.20728e-08	0.00129168
GLUD1,SUCLG1	8.86632e-08	0.00129456
GPSM2,DCLRE1B	4.92136e-07	0.00129504
SPON2,PDGFRB	1.07797e-10	0.00129918
CYYR1,ARHGAP28	2.01497e-13	0.00130742
KIF12,SMPDL3B	3.03611e-07	0.00131057
RSU1,ACLY	3.41097e-09	0.00131436
SPAG5,CEP55	1.11538e-11	0.00131923
SLC41A1,SLC2A1	4.98614e-14	0.00132695
APLNR,VWF	3.62439e-07	0.00133493
ANGPTL4,P4HA2	1.27933e-10	0.00134163
ERBB2,SOX13	5.00155e-07	0.00134633
ATP6V0A1,ACO2	1.61355e-08	0.00135231
GCDH,MPV17L2	3.98161e-11	0.00135391
GSPT1,TTC27	1.90799e-07	0.00135744
DEPDC1B,TIMELESS	2.4423e-14	0.00135879
CCDC150,BRCA2	3.25902e-10	0.00136264
MMP2,PLAU	4.37034e-07	0.00136553
ATP5L,RPL22	5.51954e-08	0.00136971
GSS,VPS25	2.01916e-10	0.00138014
NACC1,ACLY	5.51208e-10	0.00138253
DMWD,PLEKHG2	1.90604e-07	0.00138486
MYADM,SLC9A1	1.99068e-08	0.00138494
ALG2,LAPTM4A	2.28608e-08	0.00138544
FBXO28,SCYL2	1.98022e-08	0.00138867
SPAG5,CDK1	1.59736e-15	0.00139145
YKT6,SEC13	1.77998e-08	0.00139624
EIF2AK1,ADIPOR1	1.32769e-08	0.00140957
XRCC6,NUP93	9.25059e-10	0.00141764
SHMT1,FH	3.65159e-08	0.00141846
ANLN,DEPDC1B	4.14069e-08	0.0014245
ARHGEF15,FAM124B	2.33529e-08	0.00142583
TRUB2,MPI	2.87535e-08	0.00142671
SDF2,RAB11A	1.86325e-07	0.00142806
ARID5B,BTG1	1.16246e-08	0.00143129
GALC,APLP2	3.548e-08	0.00143428
TJP3,REEP6	1.788e-11	0.00143492
BTN3A2,CASP7	4.49696e-07	0.00143888
GPT2,KCTD5	1.26992e-07	0.00145054
KDELR1,TXNDC15	1.23035e-07	0.00146276
FDPS,UQCRC1	2.20709e-09	0.00146393
IVD,DHTKD1	1.2438e-08	0.00146632
UBE2T,DEPDC1B	1.49773e-08	0.00146717
NRM,E2F1	4.19549e-10	0.00146937
AGPAT1,GNB1	4.78977e-07	0.00147147
IPO9,KNTC1	2.525e-07	0.0014729
SLBP,CCT2	5.14768e-07	0.00148016
METAP1,NOL11	2.63544e-09	0.00148021
ATG4C,MRPL35	2.19419e-08	0.00148263
RXRA,TST	4.30288e-07	0.00150498
KIF18A,ESPL1	3.30718e-07	0.00150589
MPI,PFKFB4	4.39267e-15	0.00150769
B3GNT3,PROM2	4.77596e-09	0.00150774
ACSS2,PCYOX1	1.25936e-08	0.00151405
E2F2,SHCBP1	1.58602e-09	0.00151806
TMEM33,CUL3	2.53281e-09	0.00152218
PLAU,CXCL6	1.76561e-14	0.0015371
ANGPTL4,ERRFI1	1.29915e-10	0.00153877
LDHA,LOX	5.9148e-13	0.00154075
TRNT1,IFRD2	2.15119e-07	0.0015468
UBD,KLHDC7B	3.8359e-09	0.00154715
XRCC4,PEX2	4.15316e-08	0.00154748
PPID,PRPF38A	6.44115e-08	0.00154905
SULT1B1,GIMAP1	1.36644e-07	0.00155753
BUB1B,FAM83D	1.12049e-10	0.00156322
CPSF2,SRBD1	3.98087e-09	0.00156678
EMCN,FAM124B	2.897e-11	0.00156994
EHHADH,MCCC2	9.47996e-10	0.00157686
TMEM63C,RALGPS1	3.24022e-11	0.00158781
SPON2,COL5A2	2.8779e-07	0.00159565
DHTKD1,TIMELESS	4.99212e-08	0.00159617
COQ7,TTC30A	4.71874e-10	0.00159937
LMBRD1,TMEM9B	4.83577e-10	0.0015998
SEMA3G,ADAMTS4	9.04062e-09	0.00160548
PDK1,VEGFA	2.38675e-10	0.00160612
PLEKHG2,SGSM2	3.02636e-07	0.00161166
STAT3,RNF10	9.22062e-08	0.00161779
KRT15,AKR1B10	9.20513e-08	0.00162737
MCM10,SHCBP1	2.42721e-07	0.0016299
APLP2,SERINC1	3.94385e-08	0.00163346
XRCC3,TCF19	1.75373e-10	0.00164057
DTX3,TSPYL2	1.69851e-08	0.00164817
TYMS,WDR34	1.10912e-09	0.00164824
FAM83D,CDCA3	6.78358e-08	0.00165618
SLBP,RFC5	3.92016e-09	0.00165821
ABCB6,PTDSS2	3.91293e-07	0.00165941
ASNS,RIOK1	6.56557e-09	0.0016674
EBP,PNPLA3	4.50501e-11	0.00166842
SPAG5,KIF15	1.96168e-09	0.00166949
RASSF2,ACTB	1.14714e-07	0.0016697
ARRDC3,SGK1	1.22322e-12	0.00167648
GDE1,ATP6V0C	2.91584e-10	0.00169869
RPL5,COX4I1	3.55892e-07	0.00169981
POU2F1,AQR	2.98563e-08	0.00170724
CENPW,FAM83D	2.7202e-12	0.00171365
APLNR,CLEC1A	1.22612e-08	0.00171644
STX12,ARL8B	8.4705e-10	0.0017202
TAF6,TUBG1	2.51477e-08	0.00172825
LDHA,SLC2A3	5.28849e-07	0.00173006
APLNR,MMRN2	3.75016e-16	0.00173375
MPV17L2,AP3D1	7.06855e-08	0.00174184
SPAG5,KIF18A	3.90111e-10	0.00174343
THUMPD3,TSN	5.87553e-09	0.00174611
CLTC,TMEM33	5.30713e-09	0.00175418
DEPDC1B,TMPO	2.50683e-08	0.00175738
EIF5,PCF11	7.48658e-10	0.00175881
GPR4,TINAGL1	6.25484e-10	0.00175886
ZWILCH,XRCC5	4.78165e-08	0.00176635
NICN1,GSS	6.60308e-09	0.00176836
PLIN2,SLC16A3	1.40081e-10	0.0017694
DEPDC1B,PTTG1	1.1483e-14	0.00177236
FMOD,MYL3	1.87002e-09	0.00177429
ZNF366,GJA4	4.81685e-07	0.00177812
RAD51AP1,DEPDC1B	1.26284e-10	0.00178034
SPON2,CSPG4	1.20159e-07	0.00178072
CS,IPO9	2.96303e-08	0.00178221
UBL3,CUL3	4.19458e-07	0.00179202
DOCK1,NRP1	1.30183e-10	0.00179451
FAM83D,GINS1	2.01345e-10	0.00180482
DCTN2,GSS	3.32619e-09	0.00180826
SPON2,CD248	9.12945e-10	0.00181197
LDHB,RPL22	2.10803e-09	0.00181536
DHTKD1,ACAT1	4.0843e-07	0.00182852
RIT1,PLEKHB2	3.99083e-09	0.00183039
NFKBIZ,CSRNP1	4.41608e-07	0.0018309
ARL3,TUBA1A	5.03192e-07	0.00183128
ALDH6A1,PNPO	3.52756e-08	0.00183363
NAP1L1,ST13	1.56592e-07	0.00183409
C2orf42,DET1	1.20157e-07	0.00183462
COX7A2,RPL31	1.84299e-07	0.00184572
ORMDL2,CAP1	1.57584e-11	0.00184976
SLC16A1,GPT2	6.26448e-12	0.00185741
AIF1,SYK	2.28536e-09	0.00185818
ALKBH1,NOL11	1.40346e-09	0.00187182
STAP1,SAMSN1	3.05513e-07	0.00188006
CLYBL,CDNF	1.03754e-07	0.00188076
SF3A3,DNAJC9	8.82785e-12	0.00188838
ACOX1,TMBIM6	7.14022e-08	0.00188865
PTGES,TMEM45A	1.96975e-09	0.00188962
FBLN2,PMEPA1	6.7917e-10	0.00189125
CPD,CANX	2.57342e-07	0.00189306
EGLN3,MPI	1.54448e-12	0.00189528
COL4A1,SOX17	4.98165e-07	0.00189796
CERCAM,ATP6AP1	1.08762e-09	0.00189933
CLUAP1,ZNF132	1.99164e-07	0.00190124
B3GNT3,MALL	7.09582e-13	0.00190586
ULK3,TTC31	3.29255e-07	0.00190614
MPI,PDK1	1.17534e-14	0.0019459
DNAJC16,VPS13C	3.55707e-08	0.00194719
PIK3R5,FGD3	1.78611e-09	0.00194874
PRAME,HOXC11	1.68211e-09	0.00196662
ARCN1,NSF	2.32287e-07	0.00196698
GDE1,RNF10	5.558e-08	0.0019737
GPR4,KDR	1.52719e-10	0.00197602
PNRC1,MNT	9.24612e-08	0.00197849
GAS8,CCDC113	1.17531e-09	0.00199138
ESCO2,DEPDC1B	3.57002e-07	0.00200929
ORMDL2,POLD4	5.65397e-08	0.00201765
OGFOD1,DNAJA3	4.87847e-09	0.00202222
SLC2A1,MPI	3.76136e-15	0.00202419
CPSF2,SERBP1	1.4333e-07	0.00203139
ALDH9A1,BCKDHB	3.28956e-09	0.00203525
ZNF671,ZNF561	2.4264e-07	0.0020371
KLK7,OVOL2	5.48639e-13	0.00204455
ENO2,LPCAT4	3.52883e-12	0.00206087
USH1C,AK7	2.72889e-12	0.00206565
LIN54,SLBP	7.25798e-08	0.00207245
PSAT1,SLC7A1	1.27155e-09	0.00207342
NOM1,UPF2	2.14597e-07	0.0020735
POLD3,MCM2	7.74083e-08	0.00207507
UBE4B,RCOR3	3.02475e-07	0.00207972
LOX,INSIG2	2.2048e-07	0.00208002
PRAME,BRSK1	1.06956e-07	0.00208412
ITGA4,ATP2A3	4.97122e-08	0.00208761
SF3A3,NUP93	2.67813e-09	0.00209217
UTP20,PINX1	1.67651e-07	0.00209766
TPRG1L,HAGH	9.01213e-08	0.00210628
G3BP1,ST13	3.99913e-07	0.00210816
SCD,MTHFD1	4.36035e-07	0.00211068
NSF,RAP1GDS1	2.24486e-10	0.00211736
RNF141,HSBP1	3.67899e-08	0.00211919
PFKFB3,VEGFA	3.37316e-19	0.00211995
SHCBP1,CCNA2	6.90067e-08	0.00212186
FLT1,PECAM1	4.62253e-07	0.00212399
ANXA13,SPINK1	1.06176e-09	0.00213133
MPI,IVD	2.40279e-10	0.00213152
HOXA2,HOXD4	5.28935e-07	0.0021351
RFC2,SHMT1	6.05964e-10	0.00213568
FAM103A1,TSN	2.41786e-07	0.00214471
CDCA5,ESPL1	2.38796e-08	0.00214985
ESPL1,CDK1	3.64973e-11	0.00215525
FAM83D,RAD54L	3.81801e-07	0.00215563
P4HA1,DDIT4	4.88962e-10	0.00215917
AP2M1,CTSB	1.56544e-11	0.00216319
PTGES,TGM2	5.66751e-09	0.00216821
EBP,ACLY	1.13952e-08	0.00217663
HTRA1,FAT4	3.33014e-08	0.00218505
INSIG2,P4HA2	8.56299e-14	0.00220093
VEGFA,ENO1	2.87503e-08	0.0022069
CLDN4,FUT3	1.25739e-07	0.00220911
GJA5,MMRN2	1.16914e-09	0.00222443
KDR,NOS3	3.28492e-11	0.00222581
CYP3A7,UGT2B10	5.62492e-17	0.00223225
HOXC13,TFAP2C	1.95904e-08	0.00223567
TOMM20,RPL15	2.88152e-07	0.00223752
RPA1,CYB5B	4.17556e-07	0.00223762
CLEC14A,KDR	1.20719e-10	0.002243
EMP1,NRP1	8.64634e-13	0.00224691
DEPDC1B,CDCA3	1.79492e-09	0.00225855
STC2,LDHA	6.14969e-15	0.00227392
ROBO2,PCDH15	2.30152e-13	0.00227563
BSN,KLC2	1.5892e-09	0.00227669
SLC26A3,GBA3	2.95778e-08	0.00227733
DUT,HMGN2	3.70454e-07	0.00228099
NDUFA4,SKP1	5.11447e-07	0.00228392
PLIN2,RENBP	4.67862e-12	0.00229352
PNP,PFN1	3.63946e-07	0.00229713
AKAP8L,IK	2.32198e-07	0.00229919
EDN1,MYL12B	3.89013e-08	0.00230901
PFKP,ANXA11	9.93499e-12	0.00231545
FDPS,LDHB	2.09837e-07	0.00232336
DCTN6,DYNLT1	1.22606e-07	0.00233455
CAP1,NCOA4	9.88187e-08	0.00234131
HAO1,UGT2A3	5.56568e-08	0.00234751
PCDH12,CD79B	6.62271e-09	0.00235
GLB1,CTSA	4.01008e-10	0.00235573
NAA40,DDX42	1.42988e-07	0.00236255
STARD8,LCP2	3.41456e-08	0.00237391
SPAG5,FANCD2	1.54685e-11	0.00237526
EFHC1,TCTN1	6.2601e-13	0.00238051
PIM3,PFKFB3	3.85888e-07	0.00238239
TEK,FCN3	1.23477e-10	0.00238707
SPAG5,FBXO43	2.57563e-12	0.00238829
TMEM184A,SLC39A5	3.01962e-07	0.00239152
EDN1,FLT1	9.53075e-18	0.0023924
RENBP,CAPG	5.20807e-11	0.00239516
FAM111B,SHCBP1	4.7077e-08	0.0023982
MCM10,DEPDC1B	4.01276e-08	0.0024022
LAG3,DTX3	3.05731e-07	0.00240397
ZBED2,CD3G	1.05695e-07	0.00241022
CD34,STARD8	4.93877e-07	0.00241129
BUB3,SPAG5	3.96446e-12	0.00241173
DHTKD1,MCCC2	1.01099e-07	0.00241721
ARMCX3,LAPTM4A	1.2111e-07	0.00241742
SERBP1,CYCS	8.27752e-08	0.00241807
DDIT4,P4HA2	9.57144e-13	0.00242145
PHKA2,SSH3	1.37969e-12	0.0024217
RGL2,NBR1	7.57151e-08	0.00242384
LMNB1,DEPDC1B	1.45142e-10	0.00242736
CDC45,ESPL1	9.97582e-10	0.00244713
KLHDC7B,IL21R	1.04719e-07	0.00244765
PIAS3,SLC44A2	8.55177e-08	0.00245719
HCFC1R1,FTL	1.21878e-09	0.00246225
OGFOD1,EIF3J	7.24685e-08	0.00246367
NOTCH1,TRIM8	7.36027e-08	0.00247522
POLR3B,RBM19	3.28998e-07	0.00247657
SPAG5,RAD51AP1	5.70775e-12	0.00248487
SPAG5,MCM10	2.63391e-09	0.00249397
POLR3B,ZMYM4	2.9372e-07	0.00250404
TM4SF1,SHROOM4	2.33756e-10	0.00252355
FCGRT,ACAD10	3.61997e-08	0.00254526
CCDC113,TTC30A	7.83466e-10	0.00257007
CLIP3,ARL3	4.35719e-07	0.00257046
RHOJ,ITGA8	9.65404e-12	0.00257239
HOXC11,HOXD10	9.14326e-09	0.00257651
PLEKHG2,DOT1L	1.03894e-07	0.00258144
ENO1,HK1	4.93751e-07	0.00258173
ITPR2,PTPN14	4.65378e-07	0.00258215
CENPA,SHCBP1	1.85345e-08	0.00258568
PELI1,PNPLA8	3.55558e-08	0.00258842
ALDH3A2,FH	2.94465e-07	0.00258865
CETN3,DYNC2LI1	8.93078e-08	0.00259333
COL4A1,ST5	1.39975e-08	0.00260199
NOS3,FCN3	4.02461e-16	0.0026148
VTA1,POLR2K	1.84792e-07	0.00262508
SPAG5,EME1	4.98745e-12	0.00262699
ESPL1,CDC6	8.23724e-10	0.00262738
ACTB,TPM4	2.41466e-08	0.002629
LAMC1,P4HA2	9.80382e-08	0.00263813
KLHL18,NUP153	3.37558e-08	0.00263952
RBM43,TRIM14	4.28042e-08	0.0026544
MARS,GPT2	1.29562e-12	0.00265445
CPSF2,GEMIN5	1.75768e-13	0.00265633
ZNF552,PIGM	2.87606e-07	0.00266021
INSIG2,TSPAN31	1.32653e-07	0.0026626
GPR4,STARD8	4.27736e-08	0.00266304
CCNE1,FAM83D	1.10364e-07	0.00267278
GSTK1,AKR7A2	1.13014e-09	0.0026745
LILRB4,SYK	3.06632e-08	0.00267696
PQLC3,SSH3	8.55206e-10	0.00267719
FLT1,GPR4	1.8623e-08	0.00267882
ADCK2,UAP1L1	8.39324e-09	0.00268662
DNM1L,DDX1	3.95851e-07	0.0026884
CYYR1,PCDH12	4.4151e-07	0.00269055
SRGAP2,RAPGEF2	1.23869e-07	0.00269058
KDR,FHL5	1.10508e-09	0.00269305
EXOC3,CAPN1	2.40418e-07	0.00269734
ENO2,BNIP3	1.66604e-08	0.00270367
ACLY,NOLC1	5.252e-07	0.00270694
LMNB1,ESPL1	2.30866e-11	0.00270751
IDH3A,VTA1	2.09548e-08	0.00270847
PDIA5,SEC63	6.50937e-08	0.00271519
DUSP4,RND3	2.44464e-07	0.00271912
NSF,ATP6V1A	9.16949e-09	0.00272465
PDK4,MRC1	9.45268e-08	0.0027403
RTTN,MSH2	1.03042e-07	0.00274108
GEMIN5,UTP20	2.58404e-07	0.00274329
POLH,KATNAL1	1.27804e-08	0.00274454
AMFR,STAU1	1.08287e-07	0.0027451
DHTKD1,TST	3.61367e-07	0.00274818
MXI1,TPT1	2.38607e-10	0.00274893
TRAM1L1,MMP16	1.0959e-08	0.00275034
ALDH2,IDH1	4.04805e-07	0.00275107
VIL1,ISX	4.03007e-11	0.0027539
SHMT2,POLR1E	3.05644e-09	0.00275678
MYL6,TXN	3.48171e-08	0.00275734
LATS2,SDC4	3.69029e-14	0.00275775
KDELR3,PLOD1	3.09813e-11	0.00276008
CRTC1,SKI	4.75913e-08	0.00276683
ALDOC,PPP2R1A	5.71256e-10	0.00277116
KHDRBS1,KDM2B	7.76464e-10	0.0027872
RNASET2,ATP6AP1	9.62245e-13	0.00278953
PER2,DOT1L	3.8797e-08	0.00279814
FLT1,HSPA12B	1.26831e-07	0.0028038
TEAD2,ANGPTL2	1.90604e-17	0.0028069
ALDOA,PDK1	3.0062e-08	0.00281115
IBTK,GRSF1	1.79714e-08	0.00281142
IQGAP3,FBXO43	4.27361e-09	0.00281153
SPAG5,CENPW	8.42942e-14	0.00281648
ABCB6,TRMU	4.15923e-11	0.00282299
GNPDA1,LIPA	8.63521e-10	0.00282472
ENC1,ERRFI1	8.38406e-10	0.00283207
LRRC6,CCDC74A	8.3157e-10	0.00283776
P2RY10,SAMSN1	2.29441e-07	0.00285781
HK1,DNM1L	1.88731e-09	0.00286482
SERPINF1,FUCA1	5.76468e-13	0.0028701
SHCBP1,ESPL1	1.26196e-10	0.00287617
CYP3A4,SERPINA7	1.39997e-09	0.00287911
MLKL,POLD3	5.64855e-10	0.00288398
CAP1,HIGD1A	2.46141e-16	0.00290469
C11orf54,ADAM10	3.24752e-11	0.002908
MAL2,ATP2C2	1.15346e-07	0.00290816
DHX40,STXBP3	4.4083e-08	0.00291478
EHHADH,RBM43	3.00464e-07	0.00291491
MMP7,PRRX1	1.31581e-07	0.00291564
DHTKD1,IPO9	1.40132e-10	0.00292181
KDR,TIE1	5.16862e-10	0.00292295
NRM,HAUS5	1.6064e-07	0.002928
NOTCH1,ZNF276	1.64674e-07	0.00292965
ERCC6L,DEPDC1B	2.71785e-07	0.00293804
PCDH12,FAM124B	8.08117e-08	0.00294733
PPIC,EHD2	2.64376e-07	0.00295038
ELP4,FASTKD1	1.02483e-08	0.00295507
ATP6V1H,LMBRD1	1.3387e-08	0.00295564
CYYR1,GJA5	9.73627e-10	0.002956
PCCB,DHTKD1	2.38913e-07	0.00296368
GSS,MMS19	1.47393e-16	0.002969
PMAIP1,DDX58	8.76407e-10	0.00296933
SLC16A1,MTHFD1	6.75398e-10	0.0029701
FERMT3,FGD3	2.25453e-08	0.00297601
THUMPD3,TOMM20	8.84274e-08	0.00300277
GAS6,AGRN	5.15245e-07	0.00300605
GLB1L,ARMC9	1.12378e-07	0.00300755
EZH2,DEPDC1B	3.16257e-09	0.00302448
ESPL1,MELK	1.7684e-07	0.00302666
TKT,MTMR14	1.8058e-11	0.0030285
GTF2H4,XPO5	3.21025e-08	0.00303134
MSH2,CYB5B	6.41629e-08	0.00303595
GJA4,SHROOM4	2.35258e-12	0.0030444
GSTZ1,DHTKD1	1.12657e-09	0.00304593
THBS1,ACTB	7.09699e-08	0.00304823
ACSL3,TMEM97	3.63362e-09	0.00305147
DDB2,TYMS	1.66959e-07	0.00305675
WIPI1,PIGS	5.72244e-09	0.00306739
ITGA6,ITGA3	3.69845e-11	0.00308863
MMS19,RPUSD4	1.03506e-08	0.00310098
RAMP3,MMRN2	2.47267e-12	0.00310193
CMBL,SUCLG1	1.18877e-13	0.00311077
SYT14,MMP16	3.67533e-10	0.0031158
TMEM189,SURF4	2.74355e-08	0.00311776
UBE2J1,TWF1	3.5712e-09	0.00312235
ENOX2,TCHP	3.56197e-07	0.00312755
PLIN2,ARRDC3	1.35069e-17	0.00313153
DVL3,CPSF7	5.26793e-07	0.00313401
FBXO43,ESPL1	3.69602e-09	0.00314078
LOX,PDK1	6.24206e-09	0.00314254
SPAG5,DTL	8.6442e-16	0.00314354
BTN3A3,CASP7	2.10948e-08	0.00316326
GPR4,EMCN	1.96713e-13	0.00316362
USH1C,B3GNT3	4.63976e-18	0.00316441
SPAG5,DEPDC1	8.16687e-09	0.00316727
ADD3,ELF1	3.92702e-07	0.00316846
CNTROB,TMEM107	2.07201e-07	0.00316895
TNIP1,RNF10	2.30941e-07	0.00318067
DSG2,RAI14	1.03676e-09	0.00318277
KLF9,COPS2	2.80916e-07	0.00318377
VIM,ENO1	4.87745e-09	0.00318505
ASPA,TTR	3.25019e-10	0.00318689
INVS,LRSAM1	1.06856e-07	0.00320189
GSS,COG4	1.26864e-09	0.00320655
B9D1,APOO	5.0362e-08	0.00321206
PLXND1,SLC4A2	5.22336e-07	0.00321358
FLT1,GJA4	7.0139e-15	0.00322149
ATP2A3,TRANK1	1.19573e-07	0.00323485
SASH3,FGD3	5.82039e-08	0.00324551
APLNR,SEMA3G	5.27676e-07	0.00324791
SPAG5,ZWINT	5.51421e-15	0.00325386
EIF4E,NOL11	6.82661e-10	0.00326531
ARHGAP28,RHOJ	5.20945e-17	0.00326819
EPN3,RARG	1.15428e-09	0.00327563
FGGY,BCKDHB	2.70899e-09	0.00327969
SLC26A6,MMS19	2.57349e-08	0.00327984
MYO1F,FGD3	6.34773e-09	0.00328624
ATF6B,NIT1	5.3884e-08	0.00329154
SLC3A1,SUCLG1	2.4955e-07	0.00329196
EIF4E,XRCC5	1.59336e-10	0.0032934
APLP2,PPT1	2.13261e-08	0.0033034
DLD,ASNSD1	3.15675e-07	0.00331711
STC2,SARS	1.47129e-16	0.00331893
BUB3,GDI2	6.63172e-08	0.0033237
NSUN5P1,ANKZF1	1.26204e-07	0.00333016
KDR,NOTCH4	3.08652e-10	0.00333306
C1R,SVEP1	7.43659e-09	0.00334942
EGLN3,P4HA2	8.42785e-15	0.00335604
RCN2,DHX40	4.7566e-11	0.00336008
CCNDBP1,SUPT4H1	1.29347e-07	0.00339096
EIF4E,VTA1	5.67371e-09	0.00340315
KDR,ECSCR	2.29397e-09	0.00340534
CREB3L1,LASP1	2.91174e-08	0.0034102
PLCG2,NPL	3.11044e-11	0.00341073
ZNF623,SETDB1	7.13879e-08	0.00341318
VAV1,FGD3	3.15784e-07	0.003415
EDN1,CRIM1	3.83786e-09	0.00342727
HMOX1,GM2A	1.28952e-07	0.0034442
SKI,FBRS	3.54338e-07	0.00344604
PCBP1,TRIM8	2.13447e-08	0.00344752
GRB2,ADIPOR1	3.40626e-07	0.00348067
SPAG5,OIP5	2.91953e-11	0.00348303
STC1,NRP1	5.8853e-09	0.0034833
ATP6V1D,STX7	2.44419e-07	0.00349439
KLF10,MAP1LC3B	6.05184e-09	0.00349604
LRRC32,ITGA8	5.96792e-09	0.00350347
ST14,CD1D	1.02418e-08	0.00351285
ANO8,PLEKHG2	8.0799e-12	0.00353314
PLAGL2,RAE1	6.71475e-09	0.00354261
BCHE,LRRIQ1	6.01235e-12	0.0035452
SEZ6L,DPP10	4.73395e-08	0.00357122
NOTCH1,ZC3H3	6.58662e-09	0.00358003
ACADSB,NIPSNAP1	2.17794e-08	0.00358173
SLC25A5,HMGB3	1.59999e-07	0.00358464
MCAT,MFSD5	1.94431e-07	0.00359817
EME1,FAM83D	1.60596e-08	0.00359953
TMEM50A,SPCS2	2.56205e-07	0.00359963
CEP135,YTHDC1	6.50281e-12	0.00360146
GIMAP7,S1PR1	2.47171e-08	0.00360186
DOCK11,PTPRO	2.51577e-16	0.00362013
YES1,SOX13	3.2809e-08	0.00362691
C16orf54,FGD3	5.36912e-08	0.00363114
TBC1D19,TCTN1	7.62115e-09	0.00363126
ACAA2,GSTZ1	4.55497e-07	0.00363262
AMPD2,PLOD1	8.89615e-15	0.00363775
SCGB2A1,FXYD3	2.41102e-07	0.00365754
EZH2,ESPL1	6.55055e-08	0.00365872
CDCA4,FAM83D	4.36181e-07	0.00367
DEPDC1B,SHCBP1	6.84529e-12	0.00367055
TCHP,DDX42	9.68091e-08	0.00367173
PMPCA,NOL6	6.42616e-08	0.00367927
TFPI2,DUSP4	1.19727e-10	0.00368608
CTSA,MFSD5	4.44536e-10	0.00369544
SHCBP1,CDC25C	9.44181e-08	0.00369593
NOTCH3,INTS1	1.26863e-07	0.00370506
FDPS,CYC1	4.96024e-07	0.00370676
CENPO,FAM83D	3.77246e-08	0.00370872
SSH3,SLC39A11	4.97287e-07	0.00373884
WNK3,ZNF732	1.83518e-07	0.00374302
APLNR,RHOJ	8.20601e-18	0.00374449
ARAP1,SH3BP5L	3.74439e-07	0.00375203
DEPDC1B,PRC1	5.96115e-11	0.00376228
SPINK1,HNF4G	2.48516e-13	0.00376629
ELP4,BCKDHB	2.07214e-08	0.00376867
TNFAIP2,SCARF1	1.3899e-07	0.00379028
NIT1,MFSD11	8.45264e-11	0.00379611
TMC6,PTPN7	4.81685e-10	0.00381583
NBEAL2,PLEKHG2	8.5441e-12	0.00386073
CD109,LIPA	7.95141e-08	0.00386344
IFT172,LAS1L	2.13393e-07	0.00386986
EGFR,ERRFI1	4.96707e-10	0.00387121
APLP1,SLC22A17	1.48814e-07	0.00387198
FAM83D,DSN1	6.7487e-09	0.00387336
SLC41A1,PFKP	9.24591e-18	0.00388568
SPAG5,TIMELESS	2.86397e-10	0.00388793
CTSA,SLC9A1	5.83921e-11	0.0038884
LAMB1,HMCN1	2.61822e-09	0.00390112
TXNDC15,CLPTM1L	8.49269e-11	0.00391065
NFAM1,FGD3	2.20867e-07	0.00391564
SULT1B1,BMX	3.121e-08	0.00393784
CCBE1,BICC1	1.38331e-08	0.00394842
ARHGEF15,FHL5	5.83407e-08	0.00395178
TRIM10,SLC30A10	1.09236e-07	0.00396001
SPAG5,FANCI	2.61641e-15	0.00397685
PKP3,TMEM30B	6.50322e-08	0.00400008
UBR7,BUB3	5.14661e-07	0.00400328
KRT19,TINAGL1	5.14723e-07	0.00400452
UNC45B,GJA4	1.18389e-08	0.00400475
PLEKHG6,SULT2B1	4.56137e-08	0.0040088
PHYH,BPHL	1.93556e-08	0.00401082
KCNE3,CD93	1.69571e-12	0.00402679
HMOX1,SLC3A2	8.4855e-19	0.00402741
GRB2,PPT1	3.92203e-07	0.00403648
GOT2,GPT2	5.93518e-08	0.00404122
ANGPTL2,SHROOM4	1.73495e-10	0.00404161
ALDH2,ACO2	3.00485e-07	0.004054
KMO,RTP4	2.96361e-07	0.00405866
PDIA6,GLB1	6.55976e-11	0.00405881
METAP2,PSMD6	3.23781e-08	0.00406319
COL8A1,FAT4	4.05268e-07	0.00406342
SPAG5,NEK2	4.70901e-08	0.00406583
ALDOC,MPI	3.22926e-15	0.00406584
CHEK2,DEPDC1B	1.52149e-07	0.00407033
CDCA8,ESPL1	1.33438e-08	0.00407652
SPINT2,FXYD3	2.88931e-08	0.0040773
DCTN2,CAMLG	1.75298e-08	0.00407913
TTC30A,CENPBD1	2.29874e-08	0.00409701
SLBP,EIF4A3	7.47018e-12	0.00409905
FBXO7,GYPA	8.57477e-10	0.00411042
OXSM,THNSL1	2.83427e-08	0.00411252
DOCK11,MYO5A	6.76792e-08	0.00411391
GABARAPL2,MXI1	5.05582e-07	0.00412513
STX12,TMEM9B	2.06334e-11	0.0041285
EML3,FBF1	2.39599e-08	0.00414144
S1PR1,ABCD2	5.11366e-08	0.00414251
BLM,ESPL1	1.07603e-07	0.00414671
ERBB3,GRB7	2.77959e-07	0.00416781
SHMT1,CDC6	3.1411e-09	0.00416849
PMAIP1,ICAM1	8.36064e-08	0.00417366
IDH1,DHTKD1	2.04252e-07	0.00418026
TMED9,P4HA2	1.33691e-08	0.00418841
YARS2,MRPS26	2.56885e-07	0.00419165
WIZ,SKI	1.95085e-07	0.0042366
SSR1,TXNDC15	5.17318e-08	0.00423874
PLK4,DEPDC1B	2.07115e-10	0.00424771
ATP6AP2,PPT1	1.13493e-10	0.0042639
KIF15,ESPL1	4.94348e-07	0.0042714
KDR,STC1	4.76247e-08	0.00428255
TMEM176B,RARRES3	2.55747e-10	0.00428265
LIMK1,TGFB1	1.20777e-10	0.00429347
SFT2D3,ZNF180	3.17401e-07	0.00429987
HNF4A,SLC30A10	3.05816e-09	0.00430867
TAF4,CRKL	2.01286e-07	0.00431182
SEZ6L,CD1E	1.59307e-07	0.00431621
ASPA,LIPA	2.097e-16	0.00431848
ERH,ANP32E	3.80513e-09	0.00432661
DNAJC16,DNAJC11	1.19183e-08	0.00436158
SLC39A1,ADAR	9.87286e-08	0.00436348
RCC1,HSPD1	1.1097e-07	0.0043699
DDIT4,ZNF395	2.41029e-07	0.00437114
DHX40,ARIH1	2.8821e-09	0.00437934
CDC42SE1,SLC25A44	4.20594e-07	0.00440055
BRD7,DEK	4.87743e-11	0.00440194
ERRFI1,STC1	4.33947e-08	0.00441755
HOXA2,HOXD10	2.88718e-10	0.0044272
LRRC6,ZMYND10	2.32346e-10	0.0044361
SCNN1A,SOX13	6.69847e-12	0.00444409
ACADSB,RBKS	6.25599e-08	0.00444905
ZFR,ST13	1.26745e-07	0.00445002
PLIN2,MKNK2	2.7931e-08	0.0044549
AGPS,PSMC6	3.25706e-07	0.00446317
HIST2H2BE,HIST1H2BK	6.94346e-10	0.00446656
ERRFI1,SERTAD2	7.43136e-08	0.00447782
ZNF287,TTC30A	1.17132e-09	0.00448088
SPON2,COL3A1	1.17532e-07	0.00448636
GBP4,IRF1	6.14023e-10	0.00450085
IDO1,KLHDC7B	4.67539e-08	0.00450942
COL4A2,THY1	1.17326e-08	0.00451697
NCAM2,PCDHB4	3.71174e-07	0.00452785
SCFD2,MTHFD1	6.67758e-10	0.00453107
SLC2A1,P4HA2	1.01431e-22	0.00453347
YAP1,CACHD1	4.31988e-07	0.00455358
TACC3,DEPDC1B	2.62167e-12	0.00455805
MORN2,CCDC74A	7.93369e-08	0.00458037
ALAD,ACO2	2.94948e-08	0.00458485
MVP,TMUB2	2.06503e-09	0.00459972
CYP3A7,HAO1	1.04129e-15	0.0046043
GALC,TMX4	5.64344e-08	0.00460448
PAH,APCS	2.06281e-07	0.00460559
CASP10,HSH2D	5.19667e-08	0.00461477
TRAM1L1,FBXL2	4.06067e-10	0.00462838
SPAG5,TOP2A	7.48966e-09	0.00463501
CYP3A7,GSTA2	1.96927e-14	0.0046659
FADD,ATXN7L3	3.15706e-07	0.00466714
DEPDC1B,MND1	1.16357e-10	0.00467896
CLEC14A,GJA5	3.33519e-09	0.00469007
SLC26A3,SLC39A5	1.30594e-09	0.00469243
KDR,MMRN2	9.70953e-11	0.0047416
PDIA6,TM9SF1	6.68253e-09	0.00475009
EDN1,ERRFI1	2.81036e-16	0.0047548
PPAT,TMEM33	4.66744e-08	0.00477642
TOLLIP,SLC25A44	1.7597e-07	0.00478399
ZNF300,ZNF431	7.89066e-08	0.00478997
SPAG5,CENPI	1.96478e-09	0.00485059
C4orf3,ATP6V1D	8.31424e-08	0.00487046
PRKX,METTL8	1.44769e-08	0.00488192
DDIT4,BNIP3	7.36292e-10	0.00489528
SORD,HSPD1	5.49043e-08	0.00493212
SRGAP1,SIPA1L2	7.40486e-08	0.00494115
HOXA2,BCHE	5.14673e-09	0.00494279
CLEC14A,SHROOM4	1.7248e-08	0.004954
ZNHIT6,OGFOD1	3.54234e-07	0.00498496
KIF26A,TFAP2C	8.76495e-08	0.00498573
TMEM120B,ACACA	8.04441e-10	0.00498733
DCXR,AKR7A2	1.46432e-10	0.00499161
LOXL2,SLC39A13	3.90602e-08	0.00499592
SERTAD2,CCNK	4.0348e-07	0.00499697
POLH,PPM1D	1.2797e-07	0.00500693
EPS8L3,SERPINA7	7.32865e-11	0.00501107
EMP1,NDRG1	3.49167e-07	0.00502074
APEH,CAPN1	3.37718e-07	0.00503828
DEPDC1B,CDK1	7.20422e-12	0.00503871
KDELR3,ARMCX3	7.18539e-11	0.00505866
ACOX1,ETFA	1.5377e-09	0.00507659
SDCBP,RAB11A	1.74929e-12	0.00508689
ITGA3,EPS8L2	6.10437e-09	0.00508891
ROBO4,FAM124B	6.22382e-08	0.00508919
PGAM1,RAB1B	4.23383e-08	0.00510305
IL4R,NLRC5	2.92198e-07	0.00511039
ASPHD1,BRSK1	3.68577e-08	0.00511354
FAH,ALDH9A1	7.72024e-12	0.00513693
MPZL2,CLDN7	2.13322e-07	0.0051378
DNAJC16,USP24	3.45061e-07	0.00515052
RNF19B,NAPA	2.08279e-07	0.0051742
DEPDC1B,MCM8	4.28836e-12	0.00518235
DNAJB4,HSP90AA1	5.91841e-09	0.00518895
NCF2,FGD3	1.84662e-10	0.00519294
MUC13,SPINK1	2.95611e-11	0.00519529
FGD5,KIF26A	1.62724e-08	0.00520419
RPL22,SRP14	1.35594e-07	0.00520646
GINS2,ESPL1	1.82535e-07	0.00521717
AMPD2,CLSTN3	7.87299e-11	0.00522802
CREB3L4,C14orf93	9.87441e-09	0.0052379
SLC25A13,ACACA	3.27253e-10	0.00525541
GALC,SNX19	3.47637e-07	0.00526249
MKNK2,ZNF395	2.45588e-09	0.00526788
KDM2B,MCM5	3.22994e-12	0.00526888
EMCN,SOX18	2.29599e-12	0.00527908
LDHA,FKBP3	1.60449e-10	0.00528903
NSF,GOLGA5	3.05873e-08	0.00529145
IL10RB,SHKBP1	1.32812e-11	0.00531197
HOXC11,REG3G	1.01438e-07	0.00532846
TOP2A,ESPL1	8.83034e-08	0.00532992
RAMP3,GJA4	1.1016e-10	0.00533366
ABCF2,TSFM	1.75678e-10	0.00534011
RASD1,CDKN1A	4.039e-07	0.00535363
KLK8,C6orf132	4.71151e-07	0.00536744
ERRFI1,OSMR	5.44141e-10	0.00538482
FAM111B,SPAG5	1.21515e-07	0.00538629
AHSP,FHDC1	2.20771e-07	0.00539277
ANXA5,HS1BP3	6.96414e-09	0.00542528
SLC25A13,DNAJC11	1.94501e-09	0.00543572
ZBED2,PYHIN1	2.03256e-09	0.00544611
GNAI3,ZNF410	5.41143e-09	0.0054594
LSM1,MMADHC	4.11766e-07	0.005473
PLCG2,APBB1IP	3.25221e-09	0.00547567
ANKS4B,ISX	8.36165e-12	0.00552028
POLD3,PSIP1	6.1758e-09	0.00552873
ANP32E,MCM2	6.93185e-08	0.00553596
ARMC9,MPV17	6.68648e-09	0.00553849
GAS2L3,CENPN	2.23995e-10	0.00553968
NPL,WIPI1	1.23944e-08	0.00553988
LOXL2,P4HA2	4.47429e-10	0.0055418
PIM1,NFKB2	2.44323e-08	0.00554578
GABARAP,ATP6V0B	3.38538e-07	0.00555311
FGF7,THBS2	6.54317e-08	0.00559765
A1CF,SPINK1	3.34398e-10	0.00561562
PLP2,CAPN1	5.45558e-08	0.00561931
FAM83D,RFC5	1.44046e-07	0.00563569
CYB5B,CAP1	8.05974e-11	0.00565202
FANCD2,ESPL1	4.99688e-07	0.00565911
CDH17,BCAS1	5.27214e-10	0.00566474
CYR61,BCAR1	1.50768e-07	0.00569412
FGGY,ATP5A1	1.56748e-07	0.00571919
THY1,C1S	1.03002e-08	0.00574694
SPAG5,TK1	1.95056e-12	0.00577213
HOXD10,TRIM29	2.52723e-08	0.00578265
SHCBP1,TRIP13	1.95422e-08	0.00581511
ZWINT,FAM83D	8.25567e-12	0.00582822
SAMSN1,SLAMF1	1.96703e-10	0.00583239
SFXN2,PXMP2	7.36385e-08	0.00583976
SLC39A5,ISX	5.31302e-12	0.00584208
CPT1C,DTX3	1.32208e-08	0.00587883
SPAG1,CCDC113	1.67271e-10	0.00593349
APCS,APOH	4.03151e-09	0.00593597
ZNF701,ZNF671	3.97866e-07	0.00595292
SPAG5,E2F7	5.59732e-14	0.00595298
PNPLA8,DHX40	4.71342e-11	0.00596175
PCCA,SHMT1	9.64869e-12	0.00598355
GCDH,DHTKD1	4.54231e-13	0.00600641
SASH1,KDR	4.46006e-11	0.00600682
SLC25A3,TCP1	6.30329e-08	0.00601284
MKNK2,PCBP1	2.01181e-11	0.00601755
DEPDC1,ESPL1	1.71837e-07	0.00604298
RPL11,COX7A2	4.43772e-07	0.00606088
FUT3,GSDMB	6.55224e-10	0.00607158
A1CF,TTR	6.31693e-11	0.00607725
MBD6,NOTCH1	2.61886e-07	0.0060838
ATP2C2,ST14	3.0061e-09	0.00610513
TTC31,OGFOD2	1.12408e-07	0.00611263
MNT,SH3BP2	3.41382e-09	0.00614682
ANXA13,TTR	4.13212e-10	0.00617523
CYP3A7,APOC3	2.45798e-17	0.00618345
CSMD3,PCDH10	3.18116e-07	0.00618534
RRM1,UNG	2.21555e-07	0.00619031
EMCN,PECAM1	3.24665e-09	0.00619814
RNF31,TAP2	1.07686e-07	0.00620341
HACL1,BPHL	1.27457e-07	0.00621015
BLOC1S1,MFSD5	1.41151e-08	0.00621624
MCM4,DEPDC1B	2.27686e-09	0.00621734
NRP1,SRGAP1	1.02105e-09	0.00623278
FLT4,KIF26A	2.05797e-07	0.00623499
SCFD1,ANXA7	2.08794e-07	0.00623632
GJA5,TIE1	2.57947e-11	0.00624413
HECTD1,PRPF4B	2.71705e-07	0.00624898
AMFR,SENP5	7.7194e-08	0.00625818
OIP5,ESPL1	4.11237e-08	0.00626586
SEPT10,SGCB	9.5883e-08	0.00626625
DEPDC1B,CDC6	8.80649e-11	0.00627385
PI16,FBLN2	1.65579e-07	0.00627946
RARG,TFAP2C	3.99661e-09	0.00630539
APLNR,TIE1	5.56799e-14	0.00632238
ESPL1,GINS1	3.51034e-09	0.00633936
PSAT1,SREBF2	6.02645e-14	0.00635763
VAC14,NUP93	6.18655e-09	0.00635769
SPATA17,CCDC74A	3.23271e-07	0.00635881
DCK,RPA2	5.12313e-10	0.00638876
TNRC6A,GON4L	3.288e-07	0.00638932
STRN4,DEDD	5.32698e-07	0.00639005
ATP5E,UFC1	3.76468e-10	0.00639105
S100A6,TXNDC17	2.22008e-10	0.00641929
ENO1,OTUB1	1.15752e-07	0.00641972
EMCN,PLVAP	1.44886e-08	0.0064247
CERCAM,MXRA8	4.55652e-11	0.00643352
ECT2,FAM83D	6.11717e-10	0.00644262
ABCB6,SLC3A2	3.15297e-15	0.00644732
ALDH7A1,ARMCX1	1.47619e-07	0.00645046
FGF7,SULF1	3.07777e-08	0.00645328
UBR1,NSF	2.93032e-09	0.00646387
COL6A1,IGFBP4	1.11124e-07	0.0064652
FGF11,ZBTB4	2.78995e-09	0.00649614
ACSL3,CCDC47	8.23751e-09	0.0065023
NKRF,CUL3	2.04101e-07	0.00651272
ARL8A,KLHL12	3.6451e-07	0.00651277
TCF19,RECQL4	3.55205e-08	0.00653233
CLK2,NSUN5P1	3.47514e-09	0.0065326
TCF7,BCL9L	2.54169e-08	0.00655609
NPNT,MARVELD3	2.09108e-08	0.00656671
YARS2,DDX54	2.17934e-09	0.00656863
TRMT6,NOP14	4.70577e-10	0.00657487
ITGA6,SERPINE2	2.97856e-09	0.00658237
TUBG1,PPIL1	8.26094e-08	0.00660647
PIM1,STAT3	5.9342e-10	0.00661495
PRMT3,NOL11	2.89514e-07	0.006629
TMEM184A,UGT1A1	2.48084e-07	0.00663094
ARPC1B,CD68	1.26834e-07	0.00663285
INVS,CLUAP1	6.18733e-10	0.00663566
HSPD1,PPIL1	6.63956e-14	0.00666312
DBF4,LBR	2.77473e-07	0.00666489
KCNE3,PLXND1	5.2888e-11	0.00668521
NCAPH,ESPL1	2.17691e-07	0.00670114
ADD3,EFHC2	1.56072e-17	0.00670226
VWDE,CXorf57	8.12697e-08	0.00671967
IFIT1,TLR3	1.26039e-07	0.00674694
APLNR,LRRC32	1.31627e-14	0.00676896
DEPDC1B,CENPK	1.09242e-12	0.00677798
WSB2,RAB11A	2.51408e-07	0.00677799
GCLC,IDH1	3.04278e-14	0.00679574
FLT1,STC1	6.93518e-10	0.00684038
PRNP,DERL1	3.95965e-09	0.00684619
SCRIB,NOTCH1	4.99931e-11	0.00687354
NDRG1,C4orf3	1.20984e-07	0.00689383
ENO1,BNIP3	1.4189e-10	0.00689686
GPT2,MTHFD1	3.20221e-09	0.006903
SKAP1,MS4A1	7.43675e-08	0.00691105
CSTF2T,ZNF189	2.78933e-07	0.00692719
SYNPR,SVOP	6.36435e-09	0.00693645
KPNA2,FAM83D	4.20395e-07	0.00693778
ARRDC3,HIST2H2BE	6.2478e-11	0.00695209
CYYR1,EMCN	1.41028e-12	0.00695381
NIT1,MIF4GD	3.97045e-13	0.00695745
SLC39A11,MAN2A1	3.23565e-08	0.00696881
NT5DC1,RBKS	8.21863e-08	0.00697067
NUP85,ESPL1	4.61069e-10	0.00697672
GAS8,ZNF19	4.57544e-09	0.00697841
FLT4,FAM124B	9.06379e-11	0.00698608
IGFBP5,SPARCL1	1.61134e-07	0.00699984
PKLR,RNF123	6.30441e-12	0.0070003
CDK16,YY1AP1	6.58219e-08	0.00700509
AACS,TMEM97	1.8341e-09	0.00700718
ACTN1,MTHFD1	1.20855e-10	0.00703054
DNAJB9,BTG1	4.07594e-11	0.00704196
XYLT2,SCRN2	2.16937e-09	0.00704567
GDI2,HNRNPK	2.60225e-08	0.00705411
HSPA12B,GJA5	8.10005e-09	0.00705959
SLPI,TXN	2.51119e-09	0.00708884
KCNE4,PPIC	6.83988e-09	0.00709544
ENO2,MPI	1.35758e-14	0.00711139
EGLN3,LIPH	2.11365e-15	0.00711811
RPA1,ANP32A	1.62281e-07	0.00712834
TXNDC9,SCFD1	4.84853e-08	0.00713439
ANXA5,ECHDC1	1.7314e-14	0.00713676
KLHDC7B,CD3E	2.20728e-07	0.00714768
PNPLA3,GPT2	5.28066e-16	0.00716155
PLEKHG2,DENND4B	1.49844e-08	0.0071681
PKLR,SPTB	2.9658e-09	0.00717007
SORD,ACACA	1.69161e-10	0.00717679
FAM83D,PCNA	1.15011e-08	0.00717923
GJA5,NOS3	1.29539e-09	0.00721706
LIPH,CASP10	9.28466e-15	0.00723464
KIFC1,ESPL1	1.07015e-07	0.00724411
MPO,CR1	2.0776e-09	0.00726283
HSD17B14,RND2	4.28315e-08	0.0072752
HADH,FGGY	1.27184e-10	0.00728809
ADIPOR1,ATP6V0B	3.71363e-08	0.00729625
CXCL1,NCOA7	3.10507e-08	0.00732343
MGST1,GLUD1	6.96858e-08	0.00732367
VRK1,XRCC5	7.53693e-08	0.00733756
ZKSCAN5,RNF20	4.02759e-09	0.00738202
APLNR,FAM124B	2.68255e-13	0.00738341
ALDH6A1,SHMT1	1.85965e-12	0.00738874
FBLIM1,ADM2	2.91538e-07	0.00739177
TIMM44,RBM28	2.02445e-07	0.0073975
SLC37A4,ACAD10	5.44115e-15	0.00740733
KRT15,SPINT1	2.52272e-07	0.00744462
PPIC,PRDX4	2.02153e-07	0.00746239
SCAMP3,COPA	3.80769e-07	0.00746679
LIPH,MYO5B	2.0651e-07	0.00748436
ABI3,ENTPD1	1.08416e-09	0.00748938
CD300LF,SYK	3.51983e-07	0.00751969
RABGGTB,METAP2	5.48874e-09	0.00753379
GLA,PPT1	5.29111e-07	0.00753591
MALL,S100A10	1.83406e-13	0.00755695
NOMO1,SEC13	3.23158e-07	0.00755877
ECT2,DEPDC1B	1.18258e-12	0.00756426
LDHA,PPFIA4	1.0339e-20	0.00756518
RAMP3,NOTCH4	6.23919e-09	0.007575
COL6A1,SPARC	1.81533e-07	0.00757671
DNAJB1,EZR	1.06238e-08	0.00757736
PPT1,SLC12A9	2.49039e-08	0.00759094
MNT,MAML1	2.04423e-07	0.00760483
EMCN,SLIT3	5.2221e-08	0.00765717
DOCK1,PLSCR4	1.2248e-08	0.00765724
OGFOD1,TSN	1.4214e-07	0.00767144
RAD51AP1,ESPL1	3.07096e-07	0.00768554
KDR,CLEC1A	3.16501e-08	0.00773167
ZNF395,RSBN1	7.50598e-08	0.00774452
SLC25A25,TICAM1	1.02442e-07	0.00775307
BCL6B,EMCN	1.23079e-12	0.00779123
C14orf119,CAP1	1.35015e-11	0.00779863
POLD3,CDCA5	4.55148e-07	0.00783811
YARS2,SEH1L	3.02871e-07	0.00784342
ARIH1,UBE2Z	1.98128e-08	0.00784519
CSRNP3,RIMS2	6.39209e-08	0.00785255
CLEC14A,PTPRB	8.82925e-08	0.00787453
ODC1,SLBP	4.23061e-11	0.00789247
GEMIN5,MARS2	5.02639e-07	0.00791572
STYXL1,POLD4	1.59899e-07	0.0079225
FBXL2,TBC1D19	3.36028e-07	0.00794469
RAMP3,FHL5	9.25381e-08	0.00796268
ATP6AP2,SERINC1	3.74606e-07	0.00797833
TNFAIP1,SPAG9	4.13956e-08	0.00799909
SPAG5,KIFC1	5.17535e-11	0.00800288
STX12,CALM2	1.8123e-08	0.00800407
ACSM3,SORD	4.01571e-08	0.00800514
UBR7,RAD51C	3.38506e-11	0.00800636
FGF7,C1R	8.31122e-11	0.00802831
H3F3B,SRP14	7.23029e-15	0.00803235
B3GNT3,FAM83F	6.64619e-08	0.00805757
SNX14,GDI2	8.20677e-08	0.00806129
CYP3A7,APOA1	1.56892e-12	0.00806741
VWF,STARD8	9.06582e-10	0.00806747
ARAP3,DENND4B	6.27092e-08	0.0080853
ANXA4,CASP6	4.34111e-08	0.00809692
DKC1,HSPD1	5.13074e-08	0.00812454
KLK5,S100A14	7.09733e-12	0.0081299
DEPDC1B,STIL	5.20433e-13	0.00813084
CKS1B,DEPDC1B	3.25464e-07	0.00815159
ALDH9A1,SUCLG1	3.04744e-11	0.0081607
APLNR,RASIP1	5.84898e-16	0.00818887
IL16,FGD3	2.50865e-09	0.00819862
MRPL15,PPIL1	4.37096e-07	0.00820826
TST,AKR7A2	1.62419e-08	0.00821912
GPR137B,VPS41	1.43763e-07	0.00822255
CCNYL1,RASAL2	1.89913e-09	0.00822922
SUGT1,FASTKD1	5.01983e-07	0.00824948
LDLR,PTPN1	6.94656e-10	0.00825535
MIF4GD,ACBD4	1.77153e-07	0.00826659
TTC30B,EHHADH	1.80242e-08	0.00827296
ECT2,ESPL1	3.96959e-07	0.00827675
SPTB,TMC5	3.44112e-08	0.00828635
LDHA,NFIL3	1.73169e-07	0.00829559
TTR,UGT2B10	6.86581e-15	0.0083244
MGAM,ARAP3	7.6185e-11	0.0083523
C11orf54,INSIG2	4.3252e-13	0.00838478
NDRG1,ANGPTL4	3.53711e-11	0.00839369
CYYR1,ARHGEF15	1.04009e-07	0.00842257
SMPD1,SLC39A13	3.77582e-10	0.00843145
FTSJ3,ANAPC7	1.74547e-07	0.00843549
DHTKD1,NFS1	3.51299e-10	0.0084382
ACSS2,SCARB1	1.78584e-07	0.00850264
BRD7,WAC	6.05926e-12	0.00850379
CALHM2,LIMK1	6.75335e-08	0.00853038
RBM22,RAE1	7.90686e-09	0.00853987
SKA1,SHCBP1	5.28072e-07	0.008544
ZBTB43,SERTAD2	7.54763e-09	0.00855533
PLIN2,ENO1	3.018e-19	0.00856777
KDR,SELE	5.36721e-07	0.00857477
NIPSNAP1,PMPCB	2.16906e-07	0.00858456
CLYBL,FGGY	1.52129e-07	0.00858506
SPAG1,GPRC5A	1.09351e-08	0.00859586
HIPK2,ATXN2	1.038e-07	0.00860104
IFIT1,APOL3	3.49437e-08	0.00860772
PGAM1,WDR1	5.0299e-08	0.00861832
SHMT1,SLC25A1	6.13586e-09	0.00862938
DNAJB1,SGK1	2.62611e-07	0.00865018
STMN1,ESPL1	1.7959e-08	0.00865436
CAP1,UBA3	3.82582e-08	0.00865774
S100A10,GPRC5A	5.61551e-10	0.00867284
EMP1,SPRED1	4.31094e-12	0.00867773
FCN3,PDE2A	2.45973e-08	0.00868331
GIMAP4,PLVAP	5.26022e-07	0.00871019
IVD,NIPSNAP1	1.54448e-07	0.0087156
AMPD2,ASB6	4.38929e-07	0.00872089
ACO1,ACSS2	2.70927e-07	0.00873509
ANXA1,PLAU	7.92288e-08	0.00874357
MAL2,FXYD3	7.51914e-08	0.00876353
ANGPTL2,ARHGAP28	1.27601e-14	0.00879132
OMA1,CTBS	3.12697e-07	0.00880332
STX12,GABARAPL2	8.85954e-08	0.00880521
DDB1,RPA1	1.13112e-07	0.00880675
TATDN3,ADIPOR1	2.93984e-08	0.00882931
DVL3,GDI1	2.07101e-07	0.00884435
ENPP4,BCAS1	2.81799e-08	0.00885643
FBXO32,NPAS2	7.17672e-08	0.00886866
ISG20L2,MRPS17	5.85527e-08	0.00887262
ACSS2,DCTN2	6.16311e-09	0.00888584
ATP6V1D,VTA1	8.28606e-09	0.00890495
DEPDC1B,CCNB2	7.75006e-08	0.00893827
WSB2,MAP2K1	7.31133e-08	0.00894485
SLBP,HAT1	1.14653e-09	0.00895876
SPON2,P2RY8	1.21527e-07	0.00897787
SERPINA6,CLDN2	1.57789e-08	0.00900568
SLC2A2,TTR	4.49138e-13	0.00902519
GSS,GLB1	5.53597e-08	0.00902564
DEPDC1B,CCNB1	5.62548e-09	0.00902838
PGAM1,MLF2	1.90333e-09	0.00911457
DEPDC1B,BUB1B	6.66627e-14	0.00911791
ACOX1,ZFYVE1	1.95601e-11	0.00912275
EMP1,SGK1	1.80163e-08	0.00912378
HOXA4,TCF21	4.84731e-07	0.00913659
LRRC6,RSPH1	1.29415e-09	0.00914775
PQLC3,GLB1	1.20462e-08	0.0091724
GGH,MCM2	2.90935e-08	0.00919466
FBXO33,PPM1D	1.3536e-09	0.00922403
PKMYT1,ESPL1	1.81394e-07	0.00922983
SH3D19,GULP1	4.45142e-07	0.00923697
GABARAP,ATP5L	3.50152e-09	0.00923717
DUSP2,IL2RB	1.02514e-08	0.00925686
APLNR,ESAM	4.43893e-26	0.00927258
FDPS,MRPS15	3.90334e-07	0.00927327
BCL6B,GJA5	1.56047e-09	0.00928351
CTTNBP2NL,PHACTR4	3.72141e-07	0.00929864
ENO1,P4HA1	4.16039e-07	0.00930632
DTL,ESPL1	3.89341e-10	0.00932492
MAST1,TMEM63C	1.88714e-11	0.00933352
LIN54,HMGB2	6.17736e-09	0.00937175
GJA4,PCDH12	6.13276e-10	0.0093878
AMFR,PIGS	2.80949e-12	0.009409
PGAM1,NDUFA6	3.35482e-10	0.00940912
FBXO43,DEPDC1B	2.7773e-12	0.00941878
TIMM44,PYCR1	2.9298e-07	0.00941902
S100A6,MVP	2.17438e-09	0.00944033
EFHC2,ITGA2B	6.30928e-09	0.0094567
TRAP1,HSP90AB1	8.51645e-08	0.00947221
DLL4,APLNR	3.91226e-10	0.00949341
[truncated: 9,550 more rows]

## Sheet: KIRC
DCL	CILP p	Survival Analysis p
DEPDC1B,TIMELESS	8.80722e-09	2.44311e-05
CANT1,STAU1	4.69565e-09	2.6995e-05
NUPR1,ADM2	6.62866e-09	5.13302e-05
SPAG5,MCM2	1.88169e-07	0.000106618
SPAG5,TTK	4.79208e-08	0.000121794
FANCD2,DEPDC1B	8.25889e-08	0.000125947
SPAG5,CHAF1B	3.17286e-07	0.000155519
SPAG5,CDK1	2.09758e-07	0.00029149
DEPDC1B,BLM	3.11983e-07	0.000326398
CYP3A7,APOC3	1.25843e-08	0.000539944
DEPDC1B,CDC7	6.70608e-09	0.000581673
KIF2C,DEPDC1B	2.01681e-07	0.000604101
MVK,PNPLA3	2.39913e-07	0.000660071
DEPDC1B,PTTG1	2.55459e-08	0.000710622
NUPR1,HSD17B14	5.62533e-10	0.000834804
DEPDC1B,PRC1	3.08807e-08	0.000880957
SLC39A5,CLDN15	2.50068e-07	0.000909252
A1CF,ISX	1.12636e-09	0.000915436
SPAG5,ZWINT	6.33159e-08	0.000921122
LRMP,SYK	2.37561e-07	0.000943672
PATZ1,ABCD4	1.59541e-08	0.00126774
RECQL,POLD3	2.98345e-07	0.00159929
EIF5,PCF11	3.93248e-07	0.00200493
HSD17B14,IFI27L2	1.44343e-10	0.00233587
CDCA8,DEPDC1B	5.00059e-07	0.00238595
POLD3,RRM1	6.03206e-08	0.00253819
PSAT1,ALDH18A1	3.51837e-07	0.00280566
GPD1,CLDN15	2.87281e-07	0.00338912
SULT2B1,REEP6	5.10267e-08	0.00355435
DEPDC1B,STIL	6.93877e-09	0.00361464
EPRS,MSH3	1.2599e-08	0.00372605
HTATSF1,ST13	9.66006e-08	0.00375249
CYP3A7,HAO1	4.92902e-07	0.00397085
SLC16A1,STT3A	3.53818e-07	0.00408688
OGFOD1,SUPT16H	9.34238e-08	0.00412823
DEPDC1B,CENPO	1.81567e-07	0.00429194
SPAG5,BUB1B	1.2875e-07	0.00435854
AMFR,STAU1	1.85205e-09	0.00435915
DEPDC1B,BUB1B	9.89876e-10	0.00497181
SAT2,DNASE2	5.82423e-08	0.00528056
ST13,STAU1	1.09396e-09	0.00591991
LDB3,HSPB7	4.12739e-07	0.00625802
CLRN3,ISX	1.29624e-07	0.00638026
EPN3,KLK6	2.85876e-08	0.00709753
VGLL1,TMPRSS13	1.29592e-08	0.00819529
SERPINF1,FUCA1	1.40587e-07	0.00823824
GRB10,TXN	4.10043e-10	0.00832168
PSAT1,PPIL1	4.19487e-07	0.00850333
DEPDC1B,TK1	6.55472e-08	0.00890713
TPP1,ASAH1	4.27515e-07	0.00920042
PRNP,TMX4	2.82419e-07	0.0103768
ALAD,GCDH	8.72343e-08	0.0107376
SLC2A1,P4HA2	3.0294e-07	0.0110159
CCNE1,SPAG5	3.24366e-07	0.0110799
SLC16A1,EPRS	3.92907e-07	0.0113108
SYK,TBXAS1	4.41576e-09	0.0114559
RBKS,PCCA	2.60631e-07	0.0114863
IDH1,ECHS1	2.17648e-09	0.0117587
HNF4G,MTTP	1.3148e-07	0.0122531
TRIM10,PLEK2	2.80789e-07	0.0122785
SPAG5,RAD51	4.20866e-07	0.0130334
ZFYVE1,ABHD4	3.7179e-07	0.0133893
LGALS4,AMT	3.23437e-07	0.0135714
TMEM131,PLAGL2	4.26578e-07	0.0141794
DEPDC1B,GINS1	5.10233e-09	0.0142689
NPL,PPM1M	3.57944e-07	0.0145279
CSE1L,HSPD1	1.94908e-08	0.0145985
DEPDC1B,CHAF1B	6.19188e-13	0.0147094
CYP3A7,APOA1	7.23635e-09	0.0148003
HSD17B4,CCNG1	3.69973e-12	0.0149412
FAM83D,CHAF1B	1.56358e-08	0.0150698
GSS,RNASEH2A	1.41023e-07	0.0151763
ENO2,APLP1	3.88157e-07	0.0154064
NUPR1,PSAT1	4.16799e-08	0.0160157
MVK,ALDH4A1	1.75506e-09	0.0165943
HINT3,C11orf54	4.73033e-07	0.0167608
TFEC,FOLR2	2.3189e-08	0.0169001
EMCN,SOX17	2.84561e-07	0.0169388
ABCD4,NEK9	1.75852e-07	0.0169634
FABP5,NOP16	1.3011e-08	0.0171343
SMC4,SPAG5	7.08407e-08	0.0176587
FANCI,DEPDC1B	1.59084e-07	0.0179531
TPP1,FUCA1	5.64611e-08	0.0184146
LAP3,UBE2L6	2.77225e-07	0.0188083
CENPN,CHAF1B	4.51848e-10	0.0189297
SNX20,SYK	4.1384e-07	0.019571
CETN2,ACTR10	7.89606e-08	0.0196135
ZWINT,DEPDC1B	4.12251e-08	0.0197486
HELLS,DEPDC1B	2.89781e-07	0.0200175
TRIM10,APOC3	1.92705e-09	0.0201176
AKR1C1,ACSS2	5.44309e-08	0.0207523
TRMT6,RBM34	5.08752e-07	0.0213408
FBXO43,DEPDC1B	6.18646e-09	0.0214312
ZNF304,ZNF154	3.54279e-07	0.0216863
ALDH6A1,PNPO	2.58089e-12	0.0216949
TRMT6,NOP16	1.59848e-08	0.0218229
SFT2D1,ECHDC1	3.42695e-07	0.0219731
ALDH2,IDH1	2.98845e-11	0.0220852
HNF4A,ISX	5.13634e-07	0.0221784
TYMS,WDR34	4.67474e-07	0.0223224
CKM,C2	2.98922e-07	0.0225871
XYLT2,ACSF2	2.52816e-08	0.0244581
FCGRT,TPP1	4.47111e-09	0.0244718
FAM83D,TIMELESS	6.89053e-08	0.0249728
PRODH2,ISX	1.70712e-08	0.026073
GRB10,NQO2	2.5849e-08	0.0264583
GATA2,IL1RL1	4.21888e-07	0.0270306
LDHA,TXN	2.67206e-07	0.0276243
A1CF,HAO1	3.01116e-08	0.0277981
PSMD11,NUP93	1.53493e-07	0.0280365
TMEM71,CR1	4.83611e-07	0.0298257
TFAP2C,KLK11	7.51379e-08	0.0302876
G6PC,APOA1	1.88522e-08	0.0304238
ALAD,PCSK7	2.8348e-08	0.0330384
TPP1,TMEM131	1.25201e-08	0.0331805
GRB10,ADM2	2.52772e-10	0.033315
EPS8L1,C1orf106	2.18989e-07	0.0334229
UBXN8,PSMD14	4.64784e-07	0.0340237
G6PC,APOC3	7.68335e-08	0.0345228
SCGB2A1,BCAS1	3.57217e-09	0.0348983
APOC3,PCK1	1.04763e-07	0.0351075
SCAMP4,TPP1	4.93664e-07	0.0359635
DEPDC1B,CDK1	2.02163e-08	0.035981
SLC41A1,PFKP	5.2554e-09	0.0365689
ECT2,DEPDC1B	6.17611e-08	0.0371851
SPAG5,CENPW	5.59262e-08	0.0386144
SLC16A1,LMAN1	1.85044e-07	0.0395389
SERPINA4,UGT2B7	1.29702e-07	0.0396159
PSAT1,ELOVL6	5.55512e-09	0.0408869
DNAJC18,FSD1	3.51057e-07	0.0414477
PRKCQ,DEF6	1.3186e-07	0.0428376
IDH1,ACLY	3.24315e-08	0.044101
CPVL,RENBP	1.02716e-07	0.0446017
SLC25A10,TIMELESS	5.99926e-08	0.0450772
AIF1,CD53	2.14327e-07	0.0459246
PKP3,S100A14	2.15326e-07	0.046965
TMEM127,STAU1	3.80718e-09	0.0470467
NUPR1,STC2	1.23074e-07	0.0477126
CD226,PRKCQ	4.84976e-07	0.0477573
DEPDC1B,FANCG	3.68084e-07	0.0477815
ALDH6A1,ACSF2	8.64686e-08	0.0484595
AIF1,GNGT2	3.38817e-07	0.0485667
HAO1,UGT2B10	6.62516e-08	0.0486902
SYK,CXorf21	4.77144e-07	0.049181
CMKLR1,GNGT2	1.36272e-07	0.0492735
EPS8L3,ISX	8.32446e-09	0.0492971
MORF4L1,RAN	7.40048e-08	0.0498604
GLA,CTSA	2.30321e-09	0.05009
EPS8,WWC2	2.94468e-07	0.0510835
TRIM59,SPAG5	7.79965e-09	0.0514183
SPAG5,FEN1	2.82605e-08	0.0519991
TACC3,DEPDC1B	1.024e-07	0.0530062
GBA3,HAO1	1.15203e-08	0.053255
BPHL,REEP6	4.24466e-07	0.053266
TRMT6,PMM2	3.57857e-07	0.0535507
NUPR1,PCK2	2.28638e-07	0.0551079
IDH1,ACSS2	1.99558e-09	0.0552475
POLD3,CHAF1B	5.89116e-08	0.0573127
MTTP,UGT2B10	7.83855e-08	0.0593467
RAD51AP1,DEPDC1B	1.35891e-07	0.0596656
PTAFR,SYK	5.80058e-08	0.0597257
ISX,AFM	8.32284e-09	0.0602312
AK1,ADIPOR1	3.55214e-07	0.0603229
SPAG5,DNAJC9	3.32795e-07	0.0609869
SLC22A18,EPS8L1	5.08625e-08	0.0616821
CYP3A7,VNN1	3.96265e-07	0.0617058
PRSS16,PRSS22	1.34243e-08	0.0622393
UBE2L6,TRIM14	1.86172e-07	0.0622696
SPAG5,FANCD2	4.12018e-07	0.0624651
IGFBP4,NFATC4	3.13485e-07	0.0627093
SPAG5,WDR76	2.69081e-08	0.0627921
ALAD,SH3GLB2	9.3533e-08	0.0629904
GATA2,HDC	5.36953e-10	0.0633963
PSAT1,MOCOS	5.71268e-10	0.0636784
ADAM28,SYK	1.433e-08	0.0666521
ATP6V1C1,SDCBP	4.62538e-08	0.0670389
MTCH2,MTHFD1	6.67433e-09	0.067416
ZNF660,ZNF154	5.13324e-07	0.0676691
SLC25A13,ACACA	4.9991e-07	0.0697238
ELAVL1,TUBG1	5.16498e-11	0.0697487
S100A10,IQGAP1	2.48442e-07	0.0703088
TRIM69,CXCL9	1.69597e-07	0.0710587
GGH,MCM2	1.70518e-07	0.072013
EIF2S3,VDAC2	5.20363e-07	0.0721084
IDH1,PCYOX1	9.61177e-10	0.0721728
SPRR2A,CALML3	1.68871e-08	0.0723785
HNF4G,SERPINA4	2.05079e-08	0.0740214
COL1A1,VCAM1	2.40647e-07	0.0740238
TRIM69,CXCL10	1.64877e-07	0.0761726
ALDH2,ACSF2	1.28803e-07	0.0764195
PCK1,ISX	2.14492e-08	0.0772018
ADH6,TSPAN6	1.79987e-07	0.0776034
SLC9A1,SESN2	8.88159e-08	0.0784376
EPS8L1,EPS8L2	3.91953e-07	0.0785821
HCLS1,SYK	1.15497e-07	0.0791661
LILRB4,SYK	3.4592e-07	0.0802379
IL1RN,KYNU	1.15952e-08	0.080377
SYK,MNDA	2.05424e-07	0.0816998
GRB10,GJA4	3.8829e-10	0.0822632
KYNU,STAT1	3.57821e-07	0.0825008
KDELR3,SEC13	2.51912e-08	0.0834875
ZNF395,ZNF160	8.92985e-08	0.0838114
AFM,APOC3	3.09613e-07	0.0841635
LBP,PCK1	1.48326e-08	0.0860272
HSD17B14,RND2	7.58768e-08	0.0872992
SLC17A3,SERPINA4	1.91786e-09	0.0873251
IKZF1,SYK	6.86321e-08	0.0878506
ZBED2,ZAP70	3.2334e-07	0.0879122
PTPRO,TMEM62	4.86496e-07	0.0886167
CEP135,HNRNPH1	2.64001e-07	0.0887854
CTSB,DNASE2	9.58175e-09	0.0889601
PCSK9,IDH1	3.14311e-08	0.0895262
CTSB,FUCA1	3.74405e-07	0.0895874
SPRR1A,CALML3	5.26501e-08	0.0919029
CR1,CD53	3.6342e-07	0.0934682
SPINT2,TMEM30B	1.07731e-07	0.0938759
SRL,FCN3	2.03625e-08	0.0939503
GSTA1,SERPINA4	1.01576e-07	0.0944746
AKR1C2,GSTA1	2.12446e-07	0.096272
MIF4GD,GSS	7.46685e-08	0.0964513
TMEM176A,CR1	1.11166e-07	0.097275
GSTK1,NUB1	3.60257e-09	0.0979276
IL7R,IL32	6.24344e-08	0.0985697
IL2RG,PTPN7	5.16374e-09	0.0985954
FUCA1,TPMT	1.27137e-07	0.0986878
LCK,PTPN7	3.95099e-10	0.101799
GRB7,ANKS4B	8.04993e-08	0.102112
APOF,PRODH2	8.98695e-09	0.102859
NOP16,LYAR	3.14341e-07	0.104305
APOC3,PAH	1.52994e-07	0.104659
ALPI,EPS8L3	8.26449e-09	0.104717
ALB,VTN	2.64322e-07	0.106059
ALDH1B1,METTL1	1.71722e-07	0.106953
G6PC,HAO1	5.20052e-07	0.107098
FAM105A,PTGER4	1.74374e-07	0.109015
SEPT10,ANXA5	5.26418e-07	0.10926
ARHGAP4,PTPN7	6.3744e-09	0.109866
TIPIN,TIMELESS	4.96735e-08	0.109877
KCNE3,PECAM1	6.22148e-08	0.11067
DUSP6,ITGA6	1.93069e-07	0.111147
SLC22A18,TEP1	2.7675e-07	0.111543
TEX10,PRPF4	5.22191e-08	0.112147
NCKAP1L,SYK	1.37017e-07	0.112208
SAT2,ALDH2	4.72575e-07	0.112589
CPVL,C2	5.73871e-10	0.113909
SPAG5,HELLS	1.18888e-10	0.114489
PCK2,TM9SF1	1.06052e-07	0.115379
ENO2,PPFIA4	3.79846e-07	0.115478
UNC13D,SYK	1.27072e-07	0.116047
TACSTD2,KLK6	1.84787e-10	0.117156
HOXB5,POSTN	8.56948e-08	0.117556
HSPE1,PPIL1	3.84194e-08	0.117584
S100A4,CD4	5.23843e-11	0.118181
DUSP2,RASSF5	3.94874e-07	0.118869
STT3A,DNAJB9	1.19491e-07	0.120579
TXNDC11,PMM2	9.24412e-10	0.120724
TMC6,PTPN7	1.06634e-07	0.123585
PLEKHB1,NIPSNAP1	1.39641e-07	0.124078
LAMC1,PPIC	2.9805e-07	0.124251
PRKCQ,DOCK2	1.7207e-08	0.124391
KYNU,CD80	3.97411e-08	0.124667
EDN1,LAMC2	3.03866e-07	0.125217
HSD17B14,ENO2	4.66746e-09	0.125374
CYSLTR2,WIPF1	1.71362e-07	0.125721
NPL,ALDH9A1	1.71858e-08	0.126074
PSAT1,SHMT2	1.83551e-09	0.12648
A1CF,APOC3	2.48024e-07	0.12691
GBA3,FMO3	6.20652e-08	0.126999
ANKS4B,HAO1	2.79267e-07	0.127619
MGST1,MOCOS	5.98181e-08	0.128049
PIAS3,NAA40	1.43721e-08	0.129837
AKR1C1,FAH	1.81452e-08	0.130256
CR1,SYK	1.42997e-11	0.130729
ANXA13,EPS8L3	4.43636e-07	0.131864
TTLL1,NIPSNAP1	7.54219e-08	0.133189
EVI2B,SYK	2.74697e-07	0.134931
ZNF189,ZNF594	1.36201e-07	0.13501
SYK,MS4A6A	2.72186e-07	0.1351
BLOC1S1,MFSD5	1.35584e-07	0.13633
PIK3CD,MTMR14	2.52595e-07	0.136765
METTL1,DDX47	5.1016e-09	0.137901
PPARGC1B,MTOR	2.57959e-07	0.138952
DOCK1,GNG12	1.13934e-07	0.140233
C2orf48,HELLS	4.01395e-07	0.141242
GCNT3,MTTP	2.3489e-07	0.141622
COTL1,NUP93	5.06641e-09	0.144007
CPN2,AFM	7.69836e-08	0.14455
FUCA1,CTSA	2.0818e-08	0.144562
GBA3,SERPINA4	5.52624e-10	0.145785
FGD5,SOX17	1.7323e-07	0.146352
APLNR,SOX17	6.09086e-09	0.146609
TNFAIP1,ZFYVE1	3.06859e-07	0.147025
ECHS1,ALDH6A1	2.63896e-08	0.148696
PRKCQ,IKZF1	2.94278e-10	0.149258
DOCK2,SYK	5.48556e-08	0.15025
CR1,SAMSN1	4.97262e-10	0.151682
KYNU,SP110	2.29709e-08	0.152017
LRMP,PNOC	3.24965e-07	0.152489
PNPLA3,REEP6	1.16923e-08	0.154853
CPN2,ALB	4.31844e-07	0.155792
AFP,VIL1	3.7589e-07	0.15584
MCM4,TIPIN	3.54193e-07	0.155917
EAPP,ARID4A	2.37547e-07	0.156479
APOC3,UGT2A3	4.29359e-09	0.157051
PTPN7,SKAP1	3.74306e-08	0.15762
ALDH4A1,CAPN1	9.5903e-08	0.157925
GATA2,TPSB2	2.98149e-08	0.158316
IDH1,CCNG1	1.17565e-09	0.159424
TM4SF5,ISX	4.01668e-08	0.159498
APLNR,LRRC32	4.73807e-07	0.159524
APOC3,GBA3	3.19972e-08	0.160165
APLNR,NOS3	4.4874e-07	0.161013
CENPW,DEPDC1B	1.96324e-10	0.161116
ZNF660,ZNF671	7.36184e-08	0.161411
MTHFD1,SORD	1.1209e-07	0.161521
GCDH,ALDH6A1	1.02473e-08	0.161948
PARD3,TSPAN6	3.73023e-07	0.16239
FCGRT,S100A4	2.90903e-07	0.162422
PTPRC,SYK	1.92157e-07	0.163966
METAP2,ST13	1.60593e-07	0.164316
STAP1,MS4A1	8.39877e-08	0.164487
CMKLR1,HLA-DMB	9.01822e-09	0.166173
CD36,KCNE3	1.16457e-09	0.168661
CCDC150,HELLS	2.96025e-07	0.168721
SLC26A6,REEP4	5.17415e-07	0.169091
CELF3,PTPRN2	2.44016e-07	0.169147
EHHADH,TTC30A	1.16887e-07	0.169575
SYK,VAV1	2.66761e-07	0.169697
BST1,ANXA11	1.38163e-08	0.169702
ANXA5,SEC13	5.112e-09	0.169881
ZBED2,TMEM156	3.36304e-08	0.17152
PLBD1,NPL	3.35362e-07	0.173186
CPVL,HAVCR2	5.23691e-08	0.173853
FGD5,RENBP	6.21252e-08	0.173869
VGLL1,EPS8L1	4.50528e-07	0.177218
ANGPTL2,ARHGAP28	1.90467e-08	0.17784
IDH1,DHTKD1	1.11581e-11	0.178204
HSD17B14,ACSF2	4.34017e-08	0.17876
TAF1D,YTHDC1	2.91409e-08	0.180563
FUCA1,ACP5	1.2845e-10	0.180957
ALDH7A1,ACSF2	4.28957e-07	0.1812
SKAP1,MS4A1	3.162e-07	0.181631
FANCC,KIF24	4.37257e-08	0.18176
SLITRK1,SVOP	2.816e-07	0.181923
FGD5,ESAM	8.43464e-08	0.182179
PDIA5,TXNDC11	1.35143e-07	0.183698
SLC2A2,ISX	1.00842e-07	0.184803
ANP32E,MCM4	2.12889e-07	0.185436
IRF5,ADAP2	3.91007e-07	0.18565
FTH1,S100A10	6.50989e-08	0.18584
TMEM97,MCM4	9.52478e-08	0.187691
INVS,ODF2	1.44602e-08	0.187768
ALAD,ZDHHC12	5.98216e-08	0.189148
UBR7,ALKBH1	6.81731e-11	0.190573
TPP1,PEPD	1.78044e-08	0.191395
HIST1H2BK,BRI3	7.80318e-10	0.192084
TPPP3,CERCAM	1.06199e-07	0.193338
GRB10,TMEM184B	1.36067e-09	0.193835
PLP2,CAP1	3.68116e-07	0.194539
PMM2,LSG1	2.35693e-08	0.194732
PMM2,OGFOD1	7.72042e-09	0.195396
SLC25A10,CHAF1B	3.52347e-07	0.196009
S100A10,CTSB	2.96587e-07	0.196379
SAMSN1,TRAF3IP3	3.96111e-08	0.198375
APLP1,CDK5R2	5.08061e-09	0.198948
PPT1,NPL	9.61856e-08	0.201068
NUB1,PMPCB	2.80807e-07	0.201409
MTHFD2,CHAC1	1.21174e-07	0.201642
GNPDA1,CPVL	2.33739e-09	0.203143
IDH1,PEPD	8.58967e-11	0.204431
PRKCQ,KLHL6	1.87269e-09	0.204939
CMBL,ECHS1	4.47221e-07	0.207586
AIF1,SYK	7.37402e-11	0.210154
TRIM69,ZBP1	3.00555e-07	0.210464
PEPD,TMEM104	2.85858e-08	0.211325
FABP1,EPS8L3	7.802e-10	0.211392
PIK3CD,FGD3	2.05455e-07	0.212604
EPS8L3,TM4SF5	1.50078e-08	0.214679
KYNU,PARP12	4.62012e-09	0.215268
PGM3,P4HA2	2.96995e-07	0.215777
APOC3,UGT2B10	7.77766e-09	0.216345
IL2RG,TARP	4.06084e-10	0.216616
FMO3,VCAM1	1.65625e-07	0.217253
PRKCQ,CD8B	1.42538e-07	0.217926
S100A4,COTL1	1.34499e-09	0.21813
PKP3,CDS1	2.008e-08	0.218165
PTPN7,SAMSN1	1.09227e-11	0.219117
TFAP2C,TMPRSS13	1.04774e-09	0.219769
RDH11,STRN3	1.03047e-07	0.220287
VTN,AFM	4.97905e-07	0.220396
SASH1,NFIB	8.51026e-10	0.221719
FGD5,CLDN5	1.6949e-07	0.223137
CYSLTR2,TARP	1.22708e-07	0.226302
SALL2,ELOVL4	1.01042e-07	0.227042
GABRA4,SVOP	1.07362e-07	0.227746
GIMAP7,GNGT2	3.87609e-08	0.22818
GSTA2,SERPINA4	3.59642e-07	0.228222
CHRNB2,SVOP	2.2157e-08	0.228486
CPVL,SLC7A7	4.9685e-10	0.230468
SPAG5,KIF24	2.79994e-10	0.231293
CCNDBP1,ATP6V1B2	1.38285e-07	0.232276
G6PC,SERPINA4	2.81662e-07	0.233067
FAM105A,PTPRO	3.04869e-10	0.23366
ANGPTL2,HTRA1	5.90147e-10	0.234799
NYNRIN,ZNF702P	1.65812e-07	0.235571
PTPN7,CD80	3.89065e-08	0.236353
FMO3,SMOC2	3.28052e-09	0.236778
ALB,HGD	1.93712e-07	0.238144
ZBED2,SLAMF6	9.49182e-09	0.2387
TUBG1,CCNE1	2.72506e-07	0.239143
IRF5,HAVCR2	1.21362e-07	0.239553
LCK,TARP	1.01697e-09	0.239993
PEX2,EAPP	4.52483e-07	0.240744
TMEM30B,RAB17	2.20165e-07	0.24242
S100A11,TXN	8.44524e-09	0.242501
GATA2,SIGLEC6	5.20906e-09	0.242859
TMEM30B,TNK1	5.20993e-07	0.245394
LBP,PLG	1.84865e-08	0.246347
DPYS,HAO1	1.28796e-07	0.247869
PIK3R5,FGD3	4.32015e-08	0.248856
IRF5,AIF1	9.28954e-08	0.249445
MTCH2,PGAM1	3.15911e-07	0.249489
APOC3,UGT2B7	6.32053e-12	0.25111
DNAJB11,LSG1	1.27139e-07	0.251378
LBP,SLPI	5.36334e-08	0.253361
DERL1,TMEM127	1.15569e-07	0.254312
UBR7,CENPO	8.41676e-08	0.25466
S100A11,POLD4	3.87763e-09	0.254792
PRKCQ,CD3G	6.98472e-08	0.257813
CFI,TSPAN6	7.40369e-09	0.258828
TRIM29,KLK7	1.38676e-07	0.259797
CDS1,PPL	2.70596e-09	0.260749
TMEM184B,ZFYVE1	6.10525e-08	0.260848
METTL1,SLC25A19	7.80815e-11	0.260923
CCDC150,RFC3	2.63006e-08	0.261054
PLG,VTN	1.31408e-07	0.261379
PRKCQ,GRAP2	3.15524e-10	0.261662
LTBP4,TEAD2	1.08764e-07	0.261861
SKA2,DEPDC1B	2.62121e-07	0.261864
CD59,DERL1	2.50008e-07	0.262882
PRSS16,GLB1L2	7.21772e-10	0.262928
PLAU,TNFRSF1A	2.01524e-08	0.264629
DEPDC1B,GINS4	4.29808e-09	0.264638
SCGB2A1,FXYD3	4.52802e-07	0.264978
ORMDL2,PSEN1	4.61003e-08	0.26526
AMFR,MKRN1	1.65078e-07	0.265697
S100A4,FTL	6.19029e-10	0.266256
ABCD2,CYSLTR2	1.78588e-07	0.267106
NFAM1,FGD3	4.16113e-08	0.267361
DEPDC1B,RAD51	3.04423e-08	0.268283
HNF4A,EPS8L3	6.83686e-08	0.270204
APLNR,SMOC2	4.81354e-09	0.270539
SLC25A19,SLC1A5	1.28453e-08	0.272792
LAMC1,ALDH18A1	2.4033e-07	0.273698
THEMIS,PRKCQ	2.79968e-08	0.274141
CR1,FAM20A	5.70446e-09	0.274392
MPZL2,ELF3	9.97307e-08	0.275064
AKR1C2,ABCC2	2.11893e-08	0.277005
TRIM29,KLK5	2.87263e-08	0.277596
GLA,ENO1	5.2717e-07	0.278248
MTHFD1,CDCA7L	2.91614e-07	0.278706
WDR49,TPPP3	3.58647e-10	0.279748
TUBG1,NUP93	2.73844e-07	0.280322
PCDH10,SOX17	5.61628e-08	0.281223
LCP1,FGD3	2.05124e-07	0.283784
APOC3,CDHR2	1.38608e-07	0.284956
MVK,ACSS2	4.01259e-08	0.285983
ESRP1,CALML3	2.83196e-07	0.286329
REEP6,ALAD	2.37715e-07	0.286578
CPVL,TBXAS1	3.07678e-09	0.29025
SAMSN1,KLHL6	7.08146e-10	0.2906
PSAT1,STC2	3.44154e-07	0.291656
PRKCQ,SPN	5.15708e-09	0.292803
FBLIM1,TPM1	7.92029e-08	0.293274
KYNU,BLNK	7.87979e-09	0.294047
SOX17,FCN3	5.10007e-07	0.294052
ADCY7,FGD3	9.54979e-08	0.294395
ZBED2,GPR174	2.52708e-07	0.294575
TCTN1,TCTN2	2.10764e-07	0.294638
HSPD1,PPIL1	1.23743e-07	0.295262
GSTA2,HAO1	3.18736e-10	0.295375
FTL,S100A6	5.10428e-08	0.296663
RABGGTB,RARS	3.51218e-10	0.297596
BRD7,PSMD7	1.46449e-07	0.298306
CENPN,RAD51C	2.58975e-10	0.298549
IDH1,PNPLA3	1.30822e-07	0.298914
SLC16A1,ACTL6A	2.81802e-07	0.300351
ADH5,IDH1	9.87663e-08	0.300815
ITGAM,SYK	2.74936e-08	0.301724
KLK5,VGLL1	2.59214e-07	0.301866
DHCR24,SLC25A10	4.28156e-10	0.301956
FANCC,ODF2	1.01944e-07	0.302214
PRKCQ,ACAP1	2.16796e-07	0.30238
POLD4,S100A13	2.92459e-08	0.303311
SLC5A6,HSPE1	2.05703e-07	0.303318
MLLT11,APLP1	3.0121e-08	0.303342
SH3D19,COBL	4.66089e-08	0.303345
CLECL1,FCER1A	4.35748e-07	0.304451
ALAD,SLC44A2	3.86129e-07	0.304832
DUSP3,PGAM1	2.18358e-07	0.305003
OAT,TPRG1L	3.64783e-08	0.305237
ALAD,MPND	5.11049e-07	0.309724
PRPF4,SET	9.90562e-10	0.309816
TPP1,ATP6AP1	9.60376e-10	0.310792
ALDH6A1,RBKS	7.19223e-11	0.312975
IRF5,RENBP	1.30294e-09	0.313947
CYP8B1,UCA1	2.66547e-08	0.314664
ZNF572,ZNF189	4.51881e-09	0.31492
ZNF239,METTL1	4.39837e-10	0.315179
SH3D19,SASH1	5.00692e-09	0.315218
CMKLR1,FAM105A	2.77496e-10	0.315454
ALDH3A2,PNPO	1.49038e-10	0.315992
TNFRSF9,ZBED2	2.03079e-08	0.316231
GLB1L2,DHCR24	2.79217e-10	0.316257
SLC7A1,SLC16A1	3.04574e-11	0.318056
ADAP2,SYK	1.28995e-11	0.318679
APLP1,CCDC74A	2.10484e-08	0.319388
ATP6V1B2,SDCBP	5.75896e-10	0.319402
SULT2B1,CDS1	1.44271e-08	0.321404
PRKCQ,ZNF831	4.94171e-09	0.321694
CYP27A1,SASH1	9.57865e-08	0.322734
FAM135B,PCDH15	2.15531e-07	0.323225
MSH3,MNS1	2.33033e-10	0.323267
SYK,TYROBP	4.31844e-07	0.32662
FCER1A,GZMA	4.71812e-08	0.326943
APLNR,SRL	3.72619e-08	0.327368
VGLL3,FNDC1	3.45653e-07	0.327445
ECHS1,PGAM1	5.20521e-11	0.328205
CPVL,NPL	8.3398e-13	0.329264
SAT2,IFI27L2	9.98879e-09	0.329285
HSD17B14,S100A13	1.43181e-08	0.329434
DVL3,STAU1	4.80617e-08	0.331471
KCNE3,SLC7A7	4.54179e-11	0.331941
YPEL2,CALCOCO1	1.0957e-07	0.33219
TMEM189,CTSA	2.86769e-07	0.335454
COG2,FBXO28	2.30805e-08	0.335496
S100A13,ECHS1	7.84019e-10	0.335806
F2RL1,FBLIM1	2.67208e-07	0.336972
LAG3,PYHIN1	3.09462e-07	0.338351
DNAJC18,NAT14	1.83845e-07	0.339126
FGD3,PTPN7	1.38349e-08	0.339289
CSNK2A2,AMFR	6.04522e-08	0.339935
PARVG,SYK	3.82664e-07	0.342364
METTL1,RANBP1	1.70823e-08	0.342934
CSTB,TXNDC17	2.35613e-07	0.343086
COTL1,TACC3	1.17799e-07	0.343566
TLE3,SLC25A44	3.07951e-07	0.345575
MAST3,SLC9A1	3.75762e-07	0.348054
S100A4,SELPLG	7.38211e-09	0.349063
ACSS2,SLC16A5	2.41254e-07	0.349094
ALDH6A1,REEP6	9.49457e-09	0.350417
ITK,PRKCQ	2.58755e-08	0.351812
TMEM30B,SPINT1	2.38054e-08	0.352096
GJA4,FCN3	2.73757e-07	0.353395
FGF11,STC2	1.49664e-09	0.354496
SPINT2,TACSTD2	5.18586e-08	0.355896
FAM105A,AIF1	1.42669e-10	0.356643
AFP,GSTA2	1.23424e-07	0.357688
CAST,MSH3	2.74042e-07	0.357724
C11orf74,EIF3M	1.16558e-07	0.358304
KCNJ15,CCR1	4.44168e-08	0.359075
C1orf106,EPS8L3	1.66542e-07	0.359105
SASH3,FGD3	2.79242e-07	0.36055
CMKLR1,FUCA1	5.29418e-11	0.360746
FGD3,CYTIP	4.4855e-07	0.361516
DEPDC1B,DIAPH3	2.26487e-07	0.362108
DEF6,SYK	1.38328e-07	0.362546
S100A4,ADCY7	9.73403e-08	0.364142
PFKFB3,VEGFA	2.12801e-08	0.364936
PARVG,FGD3	6.95684e-08	0.366913
DHCR24,PSAT1	2.66222e-08	0.368237
AKR1C2,BAAT	2.91737e-07	0.368607
FSTL5,ROBO2	5.96631e-09	0.369134
NCF1,SYK	7.79367e-09	0.369823
TRIM54,CACNA1S	4.49071e-07	0.37047
CYSLTR2,CYTIP	3.77948e-07	0.37107
APLP1,RND2	1.29955e-09	0.371445
THY1,FBN1	3.1877e-07	0.37367
ACADSB,REEP6	3.08693e-08	0.374912
CR2,SKAP1	2.87558e-08	0.375755
ADD3,ADAM10	3.92689e-07	0.376246
SLCO2B1,UGT2B7	2.78732e-08	0.378257
COL6A1,DSEL	8.0846e-08	0.379115
EPS8,SASH1	1.98294e-07	0.379584
HCST,DUSP2	2.59067e-07	0.380204
SPATA17,TCTN2	3.42556e-08	0.380535
LAG3,CD8B	1.63933e-07	0.381919
CCDC150,KIF24	3.13532e-07	0.382478
SORCS1,MMP16	6.74339e-08	0.383029
ACSL5,PTPN7	2.03959e-07	0.383344
DOK3,FGD3	4.55653e-07	0.384646
SLC17A3,HAO1	1.09609e-07	0.385347
AKR1C1,CYP4F3	2.70373e-07	0.388259
TRIM69,LAX1	1.30483e-07	0.388735
TRIM29,CALML3	2.51588e-10	0.390131
ALS2CL,LAMC2	5.56278e-09	0.390146
CACHD1,SMARCA1	8.72753e-10	0.391001
ZNF239,NOP16	2.94309e-08	0.394919
CMBL,ACO1	6.66513e-08	0.396228
APOC3,EPS8L3	1.79253e-09	0.396271
F13A1,TMEM176A	2.55454e-07	0.397443
LAG3,PDCD1	3.26908e-08	0.397525
ESYT1,TMBIM6	1.0283e-08	0.397533
EHHADH,REEP6	2.88325e-11	0.397951
SYK,CD37	3.08691e-09	0.398521
APLNR,RHOJ	4.74415e-07	0.401614
ALDH6A1,NEK9	5.20785e-07	0.402379
TPRG1L,TMEM184B	1.69397e-07	0.404239
ETF1,RABGGTB	2.46287e-07	0.404407
CHI3L1,IL1RN	1.29985e-07	0.40518
SPARC,ESAM	4.92044e-08	0.405369
PRKCQ,PTPN7	7.58999e-11	0.406653
GCDH,DHTKD1	1.903e-08	0.406727
GRB10,SLC6A9	2.38767e-07	0.407288
LAIR1,SYK	1.86471e-07	0.408434
DEF6,FGD3	1.13492e-07	0.408924
KLHL9,ZNF189	1.24264e-07	0.40893
FUCA1,IRF5	1.85311e-07	0.409866
SYK,LAPTM5	9.60138e-08	0.409953
ITGB2,SYK	1.03229e-07	0.412171
MYL12A,TXN	1.51319e-08	0.413839
PLEKHB1,SALL2	4.44648e-07	0.414601
ATP6V1B2,ATP6AP1	1.39083e-07	0.417362
GPT2,QSOX1	7.57548e-09	0.418251
LCK,TRAF3IP3	3.24538e-07	0.418609
FUCA1,GLB1L	2.60701e-11	0.418843
LAMC1,SEC61A1	2.27398e-07	0.420017
TMEM62,ATP6V0A1	2.95624e-07	0.420107
ITGB7,PTPN7	1.66659e-07	0.420821
COL1A2,THY1	4.82169e-07	0.422007
ZBED2,POU2AF1	1.29629e-07	0.422055
SPAG5,STIL	1.52915e-08	0.422633
FAH,ACO1	1.05623e-07	0.423375
ALDH1B1,XPO5	3.38161e-08	0.424173
VPS41,GTF2H1	2.7239e-07	0.425938
GLI3,TEAD2	4.4697e-08	0.426529
FGD3,CD6	1.73771e-07	0.427124
SH3D19,MARVELD2	3.60541e-09	0.428963
CTSW,FCER1A	5.37204e-08	0.429495
TFF3,BCAS1	3.64488e-08	0.430179
KYNU,IRF5	5.07552e-10	0.430626
ICOS,ZBED2	5.27216e-07	0.431747
GLYAT,FMO3	1.2087e-08	0.433917
SASH3,SYK	9.09364e-09	0.436405
ALDH3A2,SAT2	1.42824e-07	0.437026
EPS8L3,PRODH2	1.55811e-07	0.438765
CPT1C,ATP6V1G2	5.29395e-08	0.439126
GSTA1,HAO1	4.72454e-11	0.441528
BCAS1,KLK6	2.3957e-07	0.443213
PRKCQ,SLA2	3.50755e-07	0.444817
DNAJC1,TPT1	6.26345e-09	0.445921
VWF,STARD8	2.63032e-07	0.446206
FLT1,PFKFB3	4.55686e-07	0.447499
KLK5,SULT2B1	8.21365e-08	0.448806
DKC1,METTL1	1.35366e-07	0.449591
TTLL1,GSS	4.22203e-09	0.450676
STAP1,PAX5	7.00722e-08	0.451418
WDR66,IFT122	6.73015e-08	0.451738
FERMT2,RHOJ	8.70365e-09	0.452167
SAMSN1,AIF1	3.2391e-12	0.452186
PCDH10,PCDH15	3.21695e-08	0.453653
GJB3,ATP2C2	4.05535e-07	0.453937
LDHA,HSPE1	3.02466e-07	0.454668
ABCD4,ACSF2	2.48463e-07	0.454805
LY96,NPL	5.10652e-09	0.454841
SH3D19,KIAA1217	4.55974e-07	0.454868
C6orf132,CAPN1	4.41538e-08	0.455928
CSTB,FTL	7.72947e-08	0.456776
EIF5,HNRNPU	1.11084e-08	0.457249
CPVL,MAFB	5.78517e-10	0.459013
C1orf106,MARVELD3	1.33266e-08	0.459994
VGLL1,KLK6	4.44309e-08	0.460908
CTSB,S100A11	1.27134e-10	0.463939
POLD3,FANCC	1.0715e-08	0.46394
VNN1,APOC3	1.53922e-07	0.464477
SYK,NPL	6.10683e-10	0.464516
GLYAT,HAO1	3.45638e-09	0.465957
ENO2,PPP1R3E	6.61004e-09	0.46648
LIPH,ESAM	1.43284e-11	0.466779
HOXD10,POSTN	5.10142e-08	0.466893
MTHFD1,PNPO	5.0449e-10	0.466964
DUSP2,CST7	4.20576e-07	0.467153
AIF1,CPVL	1.39506e-09	0.468508
ALDH1B1,OGFOD1	2.75961e-09	0.468698
SPAG17,GLB1L	1.74605e-09	0.469753
PCCB,DHTKD1	5.27396e-07	0.470915
GBA3,MTTP	4.81491e-08	0.475979
IL10RB,PSEN1	1.00275e-07	0.476587
CPT1C,APLP1	5.00754e-07	0.477056
IDH1,C11orf54	5.03635e-07	0.477767
KLK6,KLK10	1.07366e-07	0.478639
SNW1,ALKBH1	6.48016e-09	0.479872
STMN1,DEPDC1B	4.56966e-07	0.480761
EPS8L3,CREB3L3	5.50511e-08	0.481371
RNF144B,TPMT	3.96724e-09	0.482404
ADH6,C5	1.78911e-07	0.483218
TMPRSS13,CDH1	3.01559e-07	0.484734
KDELR3,LAMC1	5.86788e-08	0.486936
CHI3L1,RENBP	8.0818e-08	0.487958
CLRN3,EPS8L3	5.18087e-08	0.488486
SLPI,KLK8	5.99785e-08	0.490465
BICD2,PRPF4	1.4479e-09	0.491822
STC2,SARS	3.25184e-07	0.492919
POLD3,DSN1	4.43936e-07	0.493218
FGL1,SPINK1	3.12086e-07	0.494732
SH2D3A,TMEM30B	3.01212e-07	0.495636
SLC17A3,APOC3	5.61921e-08	0.497319
IDH1,CYB5B	1.16662e-07	0.498806
ALDH6A1,DCXR	9.80286e-09	0.499271
NQO2,S100A11	2.39835e-10	0.500531
ECHDC1,FIG4	2.09298e-08	0.503169
TMEM116,LACTB2	6.06604e-11	0.503697
ACLY,DNAJC11	1.06986e-07	0.503715
UBE2R2,STAU1	4.3826e-07	0.504159
SRPX2,RHOJ	3.55522e-07	0.507501
PRSS16,MST1R	1.13026e-07	0.508327
OLFM4,TACSTD2	1.17462e-09	0.510619
HIST1H2BK,FTL	5.76963e-10	0.513045
CELF3,ELAVL3	4.91747e-07	0.51308
PRKCQ,ZAP70	2.42927e-07	0.514035
ALDOC,PC	4.69373e-07	0.514834
DUSP2,CXCR3	4.75723e-07	0.514915
S100A11,TXNDC17	1.71053e-12	0.515709
MYO1F,FGD3	1.98961e-08	0.516145
SLC41A1,HK1	5.50492e-08	0.516725
DHCR24,GPT2	2.05316e-07	0.517654
PPL,CALML3	5.74524e-09	0.518163
FUCA1,SLC7A7	5.44226e-09	0.521996
ASNS,GPT2	7.46707e-09	0.522198
OLR1,IL1RN	2.32503e-09	0.522676
INVS,ZNF484	1.32924e-08	0.523174
GRB10,DOCK1	1.02859e-11	0.523727
AKR1C2,TXN	3.67894e-09	0.525616
C1orf106,C6orf132	3.56631e-07	0.526201
GPT2,ALDH6A1	1.00431e-07	0.527543
CSPP1,TGS1	6.89209e-08	0.527544
GRB10,ANXA3	1.0782e-08	0.527631
SFXN2,METTL1	8.85225e-08	0.528054
PRSS16,CLDN4	1.16672e-08	0.528857
EMP1,NT5E	9.43957e-08	0.529452
SYK,PTPN7	7.58113e-11	0.531146
GM2A,NPL	3.19934e-10	0.531467
ZBED2,CD3E	1.9891e-08	0.531899
PDIA4,MRPS33	2.01163e-07	0.532522
ANXA13,ISX	2.01059e-08	0.533105
AIF1,S100A4	6.15319e-11	0.534196
GM2A,KYNU	4.04846e-10	0.534213
IRF5,GPR137B	3.46778e-09	0.535311
ZBTB9,MFSD5	4.87331e-07	0.536422
RSPH3,FIG4	5.83873e-08	0.538155
UPK1B,B3GNT3	3.52796e-08	0.538282
CYTH4,FGD3	2.69872e-08	0.539792
PYHIN1,PRKCQ	7.89993e-09	0.540286
AKR1C1,NQO2	1.52551e-07	0.54062
POLD3,HAUS5	3.73915e-07	0.541548
HIBCH,IDH1	2.6027e-10	0.542027
FUCA1,CD68	6.06761e-09	0.544784
PCK2,SORD	2.70398e-07	0.546048
GLB1L,TCTN2	3.40458e-09	0.547177
GLB1L2,REEP6	4.23692e-07	0.547658
SAMD3,PRKCQ	1.61988e-08	0.548731
PCK2,SLC6A9	4.25194e-07	0.550275
TRIM69,SLAMF7	1.26389e-07	0.552155
TMEM156,SP140L	1.6989e-08	0.55475
FGF11,PPFIA4	3.63484e-07	0.555436
REEP6,PHYH	1.32356e-07	0.555529
TRAF3IP3,SKAP1	4.52435e-07	0.556461
AFP,EPS8L3	4.59983e-08	0.556873
ORMDL2,ATOX1	2.72103e-07	0.557424
PRKCQ,GPR174	8.65189e-08	0.559346
SLITRK1,DGKB	3.1598e-08	0.559607
MAGEH1,ELOVL4	2.5378e-08	0.562578
CPVL,CCR1	1.47172e-10	0.564041
C5orf56,LAP3	2.36487e-08	0.565609
PRKCQ,TRAT1	7.09101e-08	0.566094
NUPR1,FTH1	3.11618e-07	0.567564
ANGPTL3,HAO1	3.24604e-07	0.567992
MARS,GPT2	8.29766e-08	0.568737
INVS,ZBTB26	1.68721e-08	0.568789
MAT2A,HNRNPH1	3.23664e-07	0.568868
TRIM10,CDH1	3.31163e-08	0.569972
TMEM231,GLB1L2	2.02159e-08	0.570177
WDFY4,SYK	1.3308e-08	0.570557
TFAP2C,CELSR2	2.5072e-07	0.571439
FCGRT,FUCA1	5.49833e-10	0.57198
TRIM69,LAP3	1.94891e-07	0.572166
KIF26A,TFAP2C	2.11996e-07	0.572761
GPR137B,SDCBP	6.24534e-08	0.572921
DNAJC16,DNAJC11	3.31161e-07	0.57363
FAM20A,PREB	1.33631e-08	0.573873
GPT2,CHPF	6.28779e-09	0.574523
ARHGAP9,FGD3	1.27539e-07	0.57456
SEPT10,ITGA6	2.18759e-08	0.574764
TFAP2C,CDH1	1.25541e-07	0.575238
HOXD10,COL15A1	2.20476e-07	0.575385
GM2A,ACP5	2.34201e-09	0.575475
PNOC,KMO	4.27292e-09	0.575766
SEPT10,TEAD2	1.54149e-07	0.576023
OLR1,SRGN	8.79564e-08	0.578143
ALDOC,PPFIA4	1.85309e-08	0.579123
COTL1,S100A11	1.15436e-07	0.58079
OLR1,SLC11A1	3.58001e-08	0.581891
MVK,NIPSNAP1	2.26135e-08	0.582591
UPK1B,KLK11	3.36795e-07	0.58324
VEGFA,GPT2	5.49701e-11	0.583579
TSPYL4,TCTN2	5.52579e-08	0.586391
WSB2,DCTN6	2.13894e-07	0.589402
FGD3,PSTPIP1	3.07889e-08	0.590336
SERPINA4,PLG	5.58842e-08	0.590718
KLK5,KLK10	5.9915e-08	0.591052
SLC37A4,HAUS5	1.37376e-08	0.591249
PTMA,DHX15	3.71423e-08	0.59197
FLT1,SASH1	2.24599e-07	0.594849
C1orf106,SPINT1	2.12603e-09	0.595817
BST1,FTL	3.28902e-08	0.596539
CCDC113,TCTN1	4.05473e-09	0.59697
ZBED2,SIRPG	2.0576e-08	0.59986
IKZF3,PRKCQ	3.21638e-11	0.599916
FCN3,C2	2.102e-07	0.601362
TRAM1L1,PCDH10	7.90423e-09	0.601371
DGKB,PCDH15	9.67729e-09	0.604852
HOXA3,HOXD4	2.97098e-08	0.606461
KRT19,UPK1B	1.99116e-07	0.607447
NOP16,SLC25A19	3.41252e-09	0.608038
AASS,ALDH7A1	2.60931e-07	0.610208
PTPRO,SAMSN1	5.06669e-09	0.610524
GLB1L2,ZNF239	2.74842e-09	0.611291
DNAJC16,PIGN	4.33784e-08	0.611481
CYP3A4,UGT2B7	3.03236e-07	0.611707
WAS,FGD3	1.03601e-07	0.615073
ALDOC,NIPSNAP1	7.1843e-09	0.615509
AFP,G6PC	1.86642e-08	0.615982
FMOD,ANGPTL2	1.36587e-08	0.616966
KLK8,ESRP1	1.92355e-07	0.618178
ILDR1,C1orf106	8.82331e-09	0.61998
S100A4,ASGR2	3.82769e-10	0.620621
DHCR24,PC	3.88508e-07	0.623631
FGD3,CD37	2.21338e-08	0.623644
ZBED2,UBASH3A	2.99744e-08	0.627672
IFIT2,TNFSF10	1.89747e-07	0.627745
SYK,FERMT3	1.11158e-09	0.62989
MAP7,ATP2C2	3.50368e-07	0.631175
APLP1,SYT5	3.334e-07	0.632466
STOML2,POLR1E	4.74569e-07	0.632727
KLK8,KRTCAP3	4.12262e-09	0.634564
PSAT1,PCK2	2.52367e-08	0.634964
PIAS3,RFX5	4.37662e-08	0.63659
PPL,PLEKHG6	1.09803e-07	0.636635
S100A6,TXNDC17	3.69762e-09	0.638516
AFP,FABP1	4.29333e-07	0.639758
CDHR2,EPS8L3	2.66261e-08	0.640178
A1CF,EPS8L3	3.47891e-07	0.642817
ACAA2,ACSF2	3.80297e-08	0.643308
C6orf132,TMPRSS13	2.07945e-07	0.643778
PPFIA4,ZNF160	8.63306e-09	0.648604
GOLIM4,APP	1.07736e-07	0.65143
ZBED2,SLAMF7	8.95594e-08	0.652816
PASK,CEP72	3.67288e-07	0.653485
PGAM1,PPFIA4	2.43117e-09	0.656457
HNRNPH1,RABGGTB	7.13578e-08	0.657505
ZBED2,CD2	2.09337e-07	0.657824
GRB2,SYK	5.22457e-08	0.658731
ABCF2,METTL1	6.65589e-08	0.658873
KLK5,OVOL2	3.46206e-07	0.659223
NUPR1,HTRA1	4.3274e-08	0.6595
CYP3A7,APOH	4.07907e-07	0.659859
AKR1C1,TXN	4.23479e-08	0.661151
ANXA5,MTCH2	2.67762e-07	0.666463
PASK,CCDC34	4.22048e-07	0.666685
KCNE3,NPL	4.18271e-08	0.669378
KYNU,SLC25A13	6.66856e-08	0.669937
CAPG,CTSB	1.15185e-08	0.670919
IFT81,POLD3	3.84666e-07	0.672817
UPK1B,LIPH	2.37088e-08	0.67352
AIF1,HLA-DMB	3.02096e-09	0.675604
S100A6,CTSB	3.57728e-12	0.675789
FGL2,PTPRO	3.54156e-07	0.676276
FGF11,P4HA2	7.2119e-10	0.678488
INVS,LRSAM1	4.63342e-07	0.680891
VTN,CDHR2	2.22612e-07	0.683651
CSF3R,FGD3	2.92429e-07	0.684323
DDX47,DDX24	2.97423e-07	0.684925
FUCA1,NPL	6.57642e-12	0.685549
ITGA6,APP	3.63466e-07	0.685711
TACSTD2,KLK7	1.97087e-11	0.686849
EIF5,DDX24	1.17108e-09	0.689005
B3GNT3,PPL	1.24524e-07	0.689292
FAM20A,VTN	1.12189e-07	0.691245
SYK,ITGAL	3.41117e-07	0.692608
SASH1,SH3RF1	2.17779e-08	0.692657
ACP5,CPVL	1.43398e-09	0.693645
CD96,ZBED2	7.50442e-09	0.693719
METTL1,LSG1	3.42204e-08	0.693946
AIF1,ARHGAP4	3.36269e-08	0.695341
KLK7,OVOL2	1.48052e-08	0.69555
FAM105A,ADAP2	2.15602e-07	0.696178
DNAJC18,SPATA7	2.34491e-08	0.696227
ZBED2,CD3G	3.15943e-07	0.696305
LIPH,HGD	2.98819e-11	0.696706
NPL,SDCBP	2.4922e-12	0.699657
TRIM69,CD27	4.78011e-07	0.700288
ESRP1,KLK5	1.44262e-10	0.701576
DHTKD1,DCXR	8.63399e-10	0.702055
ALDH6A1,TST	1.76936e-07	0.704412
FERMT3,FGD3	6.35562e-08	0.704683
ITGB1BP1,HSPE1	6.15853e-08	0.705078
ZC3H8,DDX18	3.06457e-07	0.70513
COX6A2,MYOG	6.55018e-08	0.705849
RAD51C,CKS2	3.94376e-09	0.707968
EPN3,KLK7	4.30638e-08	0.708286
AFP,PAH	6.97466e-09	0.708486
SORD,GRHPR	4.88464e-08	0.709294
CORO1A,FGD3	4.22609e-08	0.710591
COL8A2,ANGPTL2	2.66223e-07	0.711537
ZBED2,GZMK	1.44972e-07	0.712139
ZNF671,ZNF160	3.01302e-07	0.713916
PRKCQ,CTSW	1.96643e-07	0.715011
GPT2,AMFR	9.73348e-08	0.715761
HLA-DMB,ACP5	2.38371e-09	0.717859
SASH1,KDR	1.90542e-08	0.71936
DGKB,SVOP	2.76391e-07	0.719936
FUCA1,ADAP2	2.00859e-09	0.720165
EIF5,MATR3	4.98071e-07	0.721112
SLC25A13,PIGW	1.81224e-07	0.721802
MAP4K1,FGD3	1.29e-07	0.721888
TFAP2C,KLK7	3.41153e-11	0.723877
SEPT10,SGCB	1.54138e-07	0.724521
UBE2Q1,CTCF	1.9343e-07	0.724722
RND2,NIPSNAP1	2.35754e-07	0.72503
SYK,WAS	1.05755e-08	0.725729
SUPT16H,MTHFD1	1.01566e-07	0.726231
F13A1,TMEM176B	3.32757e-07	0.727074
S100A13,ATOX1	2.92889e-10	0.727435
SLC39A9,PSEN1	7.43242e-08	0.728582
TPP1,HMOX1	6.8719e-09	0.732403
MAL2,KLK7	6.17156e-08	0.73356
CTSA,SLC9A1	4.21386e-07	0.734376
KLK7,SPRR1A	5.03352e-07	0.734408
HTRA1,CERCAM	3.473e-07	0.734957
APLNR,KIF26A	1.92401e-07	0.736077
ITGB2,FGD3	3.80242e-07	0.737462
PFKFB3,PPFIA4	2.17211e-10	0.737699
TRIM69,LTA	3.86433e-07	0.738491
FBN2,APP	6.63377e-08	0.73921
CSTB,TXN	1.92576e-07	0.740018
CD96,PRKCQ	9.03798e-09	0.741265
CYTH4,SYK	1.14458e-08	0.743992
PREB,IWS1	5.25483e-07	0.745122
EIF5,SNW1	3.61897e-07	0.745607
FGD5,ICAM2	1.86857e-07	0.745842
GPC6,SERPINE2	4.65809e-07	0.746441
AFP,GSTA1	1.27143e-07	0.74653
SYK,TRAF3IP3	1.76804e-08	0.746665
STX7,FIG4	2.1048e-07	0.748017
PCCA,ACSF2	2.06781e-07	0.750376
PRSS16,B3GNT3	4.52303e-07	0.752778
FCER1A,SIRPG	6.86916e-08	0.75441
ECM2,HSPB7	1.11201e-08	0.755352
NUPR1,INHBE	1.81372e-07	0.75688
KYNU,SP140L	1.95837e-11	0.758741
FMO3,RHOJ	2.19915e-08	0.759273
VLDLR,SORT1	4.22505e-08	0.759417
CLDN4,TMPRSS13	4.57615e-08	0.759799
UPK1B,SPRR1A	3.49756e-07	0.760171
HMOX1,DNASE2	2.94509e-07	0.760369
SPI1,FGD3	3.22021e-08	0.760833
PSAT1,ADM2	7.7188e-09	0.761113
PRKCQ,CD69	4.6121e-07	0.761155
MYO1F,SYK	6.22513e-09	0.761171
EIF5,BCLAF1	2.2557e-09	0.762779
PPP2R2C,WSB2	9.73827e-08	0.76297
ZCCHC8,TAF1D	3.94834e-07	0.763282
EXOSC2,REXO4	4.89876e-07	0.763992
NPAS2,SEPT10	1.07343e-08	0.76795
ROBO1,CSRNP3	8.8007e-08	0.771711
PCK2,IDH1	6.09999e-09	0.772179
TPP1,TMEM127	3.50156e-07	0.772596
KLK8,C6orf132	8.84005e-08	0.773351
ZBED2,PYHIN1	6.25779e-10	0.774178
HOXD11,POSTN	4.14066e-11	0.774502
PRKCQ,CD6	1.62685e-07	0.774673
CARD6,PARP12	1.4452e-07	0.775184
NCF2,FGD3	3.63458e-08	0.775427
S100A10,POLD4	1.07442e-10	0.776169
IDH1,TPMT	1.6109e-10	0.778828
LYAR,HSPE1	3.07313e-07	0.77904
GPT2,PDIA6	4.2621e-07	0.779725
HGD,EPS8L3	2.45619e-08	0.780201
GPT2,GCLC	2.28482e-08	0.780429
FCER1A,GZMK	1.98352e-07	0.782575
PRKCQ,CD3E	1.60216e-07	0.783444
IRF5,SLC7A7	7.57902e-11	0.783548
SAMSN1,KYNU	1.67895e-11	0.783742
PRKCQ,RHOH	2.45219e-08	0.785829
MRGPRF,HSPB7	1.08482e-08	0.787439
ZBED2,ITK	3.75553e-08	0.787703
USH1C,EPS8L3	1.02725e-08	0.787718
S100A13,CD59	1.88575e-07	0.788879
AASS,SMARCA1	1.07857e-08	0.789366
CMBL,PNPO	8.18153e-08	0.78943
CEP135,RBM17	3.1279e-07	0.790658
BPHL,ACSF2	1.85861e-07	0.790689
SENP5,LSG1	4.94088e-09	0.791255
OLR1,CD53	1.49111e-08	0.791948
PRKCQ,CD247	6.339e-08	0.793049
FMNL1,FGD3	1.49366e-08	0.793261
KLHDC7B,CBX4	3.96261e-07	0.796474
ACSL5,KYNU	2.31004e-08	0.797241
TINF2,CHD8	3.92775e-07	0.797377
PDK1,PPFIA4	1.49606e-07	0.801354
CAPG,FTL	2.19095e-07	0.801519
GJB3,CALML3	2.44017e-07	0.801624
CD59,S100A6	9.33024e-08	0.804017
FTL,GLA	6.53083e-09	0.80478
CXCL13,ZBED2	2.42556e-07	0.805467
ALDH2,RXRA	1.13088e-07	0.805756
BST1,S100A6	2.34174e-08	0.806498
MTTP,PCK1	2.69888e-09	0.807338
HTATSF1,AIFM1	4.5546e-08	0.807754
ZBED2,CD3D	2.57553e-07	0.807973
NPL,FAM49B	3.12272e-08	0.808607
SULT2B1,TMPRSS13	2.03465e-10	0.809332
PTPN7,CD53	4.37579e-08	0.81047
PLEK2,TACSTD2	2.7533e-07	0.810726
SERPINC1,UGT2B10	2.71487e-09	0.810951
SLC16A1,CCDC47	5.66056e-09	0.811115
CYP8B1,FGL1	4.30977e-07	0.811281
C1orf106,CDH1	2.58628e-11	0.811539
TBC1D10C,FGD3	2.69462e-09	0.811859
CYP27A1,VNN1	4.30091e-07	0.812272
COL19A1,CR2	1.95297e-09	0.812478
HSPD1,ALDH18A1	2.27339e-07	0.813581
RABGGTB,METAP2	4.85368e-07	0.815275
FGF11,VLDLR	2.25535e-07	0.819825
TTLL5,MPP5	4.4332e-09	0.820421
APLNR,GJA4	1.21826e-07	0.820483
RAB3IP,RNF10	2.52204e-07	0.822552
EIF5,H3F3B	1.81628e-07	0.823132
GRB10,PSPH	4.75682e-07	0.82456
ESRP1,KLK7	2.47477e-12	0.824591
LDHA,TXNDC17	2.61758e-07	0.82794
TRIM63,CYP8B1	1.83387e-07	0.828918
SAMSN1,CYTIP	3.90161e-10	0.830022
SLC39A5,EPS8L3	2.00253e-07	0.830638
GOLIM4,ACTL6A	2.87159e-07	0.832311
TINF2,TSPAN31	4.01086e-08	0.832381
MTTP,EHHADH	2.43001e-11	0.834616
HIST1H2BK,RNF181	1.21379e-07	0.834809
NPL,ADIPOR1	8.91642e-08	0.835023
CPA3,GATA2	2.35693e-08	0.836782
HIBCH,DYNC2LI1	2.77538e-07	0.836836
GPT2,DHTKD1	8.25122e-09	0.838102
MPP5,TNFAIP1	2.59899e-08	0.838241
SFXN2,PDSS1	4.65313e-07	0.83908
SAT2,S100A13	4.08392e-07	0.839594
AACS,GPT2	4.59878e-07	0.841113
SPAG1,GGH	5.1615e-09	0.842439
S100A10,TXN	3.16107e-10	0.844628
IL16,FGD3	2.04576e-07	0.845724
TARP,PRKCQ	6.00073e-09	0.846217
MGST1,TSPAN6	2.78313e-11	0.846886
PRKCQ,SLAMF6	3.26282e-08	0.849032
FUCA1,IDH1	2.45685e-07	0.850187
CDH12,ROBO2	2.99963e-07	0.851526
SH2D1A,PRKCQ	2.03018e-08	0.852258
PAH,SERPINA4	3.92864e-07	0.85314
WDR66,MNS1	1.79178e-08	0.85363
SLC37A4,ALDH6A1	1.90097e-08	0.85397
LAMB3,NEURL3	4.86695e-07	0.855507
ATP2A3,PREX1	1.5336e-07	0.855806
GNPDA1,GM2A	1.59435e-07	0.856932
OLFM1,HTRA1	2.0119e-07	0.858008
APOA1,CLDN15	4.58443e-07	0.85889
ADAP2,ST14	1.40139e-08	0.859686
GCNT3,HNF4A	3.48205e-08	0.859962
ALDH6A1,SLC25A1	2.52171e-07	0.862447
GPC6,TRAM1L1	7.27754e-09	0.862492
MGST1,CCNG1	2.88704e-08	0.863076
PSAT1,MARS	4.99307e-09	0.864177
CXCL6,KLK10	1.32277e-07	0.865654
METTL8,OGFOD1	5.19195e-10	0.866672
C6orf132,MALL	7.43268e-08	0.867885
SYNJ2,SP140L	3.06563e-07	0.870049
QSOX1,TXNDC17	1.65999e-07	0.870494
NCF4,FGD3	4.13966e-07	0.871166
SEPT10,MOCOS	1.37309e-08	0.872043
PSAT1,MTHFD1	1.80166e-08	0.872312
APLNR,FBLN2	3.32182e-08	0.873622
CARD6,CAPN1	1.90288e-07	0.874263
GLB1L2,EPS8L1	1.05822e-08	0.874754
VIL1,EPS8L3	1.72731e-07	0.878092
EFHC1,SPATA17	5.09879e-07	0.878607
HOXA3,HOXD3	2.79935e-07	0.880118
HSH2D,PTPN7	1.98695e-09	0.880978
ZBED2,P2RY10	4.30135e-07	0.881578
EHHADH,DZIP3	1.85499e-09	0.882252
PRKCQ,FASLG	2.78454e-07	0.882451
CYSLTR2,CMKLR1	3.06498e-07	0.882596
SULT2B1,VGLL1	1.75724e-07	0.88365
DHCR24,ALDH4A1	4.02492e-07	0.886454
SLC2A1,STC2	8.8872e-09	0.887748
ALDH3A2,IDH1	5.2997e-10	0.888338
S100A6,ATOX1	6.67104e-08	0.888371
S100A11,ATOX1	3.74909e-10	0.888559
ZBED2,SLAMF1	1.17292e-07	0.888564
ARHGAP15,SAMSN1	2.58352e-07	0.889304
GNPDA1,CPSF3	3.37951e-08	0.88998
TPPP3,S100A10	2.814e-07	0.892156
MTHFD1,UBR7	2.66581e-08	0.896452
ACSM3,TFDP2	3.18848e-07	0.89692
APLNR,ESAM	6.19068e-09	0.897239
COL1A1,PLAU	2.31951e-08	0.898534
RENBP,CSTB	6.06998e-09	0.899055
PRKCQ,CD2	1.69841e-07	0.900208
IL1RN,KMO	2.12681e-08	0.900836
ATP6V1B2,TMEM127	8.19602e-08	0.902847
CR2,STAP1	3.66129e-08	0.903132
PLAU,CXCL6	2.63734e-07	0.904985
KLK7,KLK10	2.71479e-08	0.905337
AFP,PLG	2.05965e-09	0.907107
ILDR1,VGLL1	7.52448e-11	0.908373
PSAT1,OGFOD1	1.3098e-12	0.910258
CELSR2,MAGEF1	1.69846e-10	0.910764
JUP,TMPRSS13	4.72285e-08	0.911029
NPL,CD53	4.34502e-09	0.913326
FBXO16,GLB1L2	2.83662e-07	0.913726
PEX2,ZNF410	4.79801e-07	0.915664
FBLN2,IGFBP4	4.94546e-07	0.916612
TRIB3,SLC1A5	1.31801e-07	0.917683
NUPR1,SHMT2	1.06624e-09	0.917856
ALDH1B1,PPIL1	3.8731e-07	0.918096
FTL,GM2A	1.34641e-09	0.918413
EIF5,ZFR	1.21379e-08	0.918575
HMOX1,FUCA1	4.01771e-12	0.920417
FAM20A,C2	1.95801e-07	0.92073
KPNA4,LSG1	3.80388e-08	0.921042
APOA1,UGT2B7	5.16353e-08	0.921861
ZBED2,ZNF831	3.21712e-07	0.922004
SH3D19,DOCK1	1.09014e-11	0.922285
ACADSB,DCXR	8.4061e-09	0.923754
CR2,TAF4B	1.07021e-07	0.924317
TBC1D15,YTHDC1	1.37629e-07	0.92561
FBLIM1,THY1	1.32566e-07	0.926088
UBASH3A,PRKCQ	1.25758e-07	0.926836
CSNK2A2,OGFOD1	1.35025e-08	0.927429
PARP12,TRIM14	9.26621e-10	0.928955
FGD3,MYO1G	1.07495e-09	0.929795
KLK6,PRSS22	2.27916e-07	0.933705
CSTB,ATOX1	1.74772e-07	0.934235
PKP3,KLK7	9.39599e-11	0.936519
CPVL,ADAP2	4.3618e-09	0.940637
ANKS4B,EPS8L3	3.24903e-08	0.941747
FGD3,ACAP1	3.74014e-08	0.943181
ACSF2,S100A13	2.69901e-11	0.943441
GLB1L2,CCDC74A	4.70709e-10	0.945149
SELPLG,FGD3	2.06966e-11	0.946441
CDH17,BCAS1	1.56161e-07	0.947455
SHMT1,ACSF2	2.64342e-09	0.948187
FMO3,COL14A1	1.66464e-08	0.948979
FCER1A,CD2	3.1886e-07	0.94947
SULF1,SMOC2	3.34822e-07	0.950857
HLA-DMB,ADAP2	2.58972e-07	0.951142
G6PC,APOH	1.13971e-07	0.951567
ANXA5,FTL	1.47023e-08	0.952668
ALDH1B1,SLC16A1	1.08866e-08	0.95277
TACSTD2,SPINT1	3.02616e-07	0.953191
MST1R,SULT2B1	3.02948e-07	0.95321
ZBED2,TIGIT	1.84922e-07	0.954735
SFXN2,KIF24	7.99059e-08	0.955332
PRSS16,PKP3	3.10894e-11	0.956561
VGLL1,ZBED2	1.48954e-08	0.95686
VGLL1,C6orf132	3.55235e-11	0.956943
ALDH1B1,NOL6	5.89666e-10	0.958497
SH3D19,APP	1.42099e-09	0.95927
PDSS1,PIGW	2.14116e-07	0.960868
MVK,ECHS1	2.37306e-07	0.963219
TARP,HSH2D	1.03987e-09	0.963355
INTS10,MAK16	2.02656e-07	0.963501
PLAU,CTSB	7.21254e-11	0.964031
IDH1,BPHL	1.16726e-07	0.964094
KLK5,S100A14	2.38418e-08	0.966487
SLC9A6,ATP6V1B2	4.66864e-07	0.967289
ZBED2,TRAT1	3.7566e-08	0.967705
MAL2,KLK5	2.53062e-09	0.968297
HIST1H2BK,SEC13	4.87547e-10	0.969109
LAP3,PARP12	2.9568e-07	0.970029
GCLC,PSAT1	2.1186e-11	0.970201
P4HA2,TMED3	1.53438e-08	0.971278
CPVL,PTAFR	3.99285e-07	0.971516
PLAU,TIMP1	6.81645e-08	0.972013
TMEM9B,TPMT	2.77515e-08	0.974512
ASGR2,PLG	2.2788e-07	0.976906
VGLL1,KLK7	2.17639e-10	0.978359
APLP1,CERCAM	3.69638e-10	0.97948
PPM1G,NOP16	4.79298e-08	0.980132
PEPD,HSD17B4	5.72301e-08	0.980188
HAO1,UGT2B7	5.28116e-09	0.982413
SORT1,RTN4	4.31584e-07	0.982815
AKR1C2,CMBL	1.88473e-08	0.983217
S100A11,CTSA	9.14775e-10	0.983452
CORO1A,SYK	3.1488e-07	0.988452
SH2D1A,ZBED2	3.35487e-08	0.989563
ASAH1,ATP6V1B2	4.37049e-08	0.990126
HSBP1,ACTR10	6.64917e-08	0.990628
EHHADH,IDH1	2.70176e-14	0.991403
APP,ATP6V0A1	4.79317e-09	0.9915
ACP5,CAPG	3.14633e-08	0.992799
CD3EAP,METTL1	1.46346e-07	0.993493
CHI3L1,SLPI	1.52341e-07	0.993692
PLEKHG6,TMPRSS13	1.19041e-08	0.994634
IDH1,ACOX1	4.44608e-07	0.994669
CYP3A4,MTTP	9.18634e-08	0.996709
KLK5,PPL	1.28178e-08	0.998407

## Sheet: KIRP
DCL	CILP p	Survival Analysis p
PTTG1,ESPL1	3.10061e-07	0.00139218
DEPDC1B,GINS4	2.64596e-07	0.00247139
PRC1,ESPL1	1.31789e-07	0.00323167
POLD3,MNS1	4.83965e-07	0.00774536
CDC45,ESPL1	1.13247e-07	0.010025
ALDH2,ACO1	4.03464e-07	0.0284908
COASY,MVP	1.93247e-07	0.0595409
DEPDC1B,CHAF1B	4.62202e-07	0.0634738
ESPL1,TRAIP	2.97086e-07	0.0640236
CYP27A1,EPHX1	2.90736e-07	0.15844
LMNB1,DEPDC1B	3.28439e-07	0.198044
DEPDC1B,PTTG1	2.69694e-07	0.213602
DEPDC1B,GINS1	1.70032e-07	0.223357
CRAT,CAPN1	2.24449e-08	0.33251
SCNN1A,SLC44A4	2.68002e-07	0.448046
HRG,ABCG8	3.15878e-07	0.460781
CDS1,ERBB3	2.96474e-07	0.504878
HDAC6,SMARCC2	4.88076e-07	0.61941
MFAP1,LLPH	5.1127e-07	0.622718
PPP2R1A,AP1M1	2.15149e-07	0.752679
UPK1B,C6orf132	2.02268e-07	0.886723

## Sheet: THCA
DCL	CILP p	Survival Analysis p
PODN,VCAM1	4.8766e-07	0.0152216
NOD2,TMPRSS13	6.15358e-08	0.0833968
LDHA,LOX	2.42021e-07	0.0961472
CNR2,SIGLEC6	1.33904e-07	0.191124
SIGLEC8,SIGLEC6	3.13904e-07	0.259531
EGLN3,PFKFB4	1.33199e-07	0.291193
BANK1,SIGLEC6	9.5844e-08	0.471242
ENG,TGM2	3.11298e-07	0.523097
CEACAM6,TMPRSS13	1.29102e-07	0.533075
CPLX2,CHGA	1.06787e-07	0.590441
TGM2,FAM83A	2.90723e-08	0.617938
PCDHB7,CXCL12	1.76902e-07	0.866934
TGM2,PLVAP	4.31262e-07	0.897969
